# Supplementary material for: Metal-free TBAI-catalyzed arylsulfonylation of activated alkenes with sulfonylhydrazides
Source: Royal Society of Chemistry journal article supplement (doi:10.1039/c4ob01651c), 2015-01-01

## **Metal-Free TBAI-Catalyzed Arylsulfonylation of Activated Alkenes with Sulfonylhydrazides**

**Wubin Yu, Peizhu Hu, Yuanyuan Fan, Congyao Yu, Xinhuan Yan, Xiaoqing Li\*,  
Xiangsheng Xu,\***

*College of chemical Engineering and Materials Science, Zhejiang University of  
Technology, Hangzhou 310014, P. R. China.  
E-mail: xqli@zjut.edu.cn; future@zjut.edu.cn*

### **Supporting Information**

1. <sup>1</sup>H and <sup>13</sup>C NMR spectra of compounds **3**-----S2-S22

131107  
hpz01 CDC13

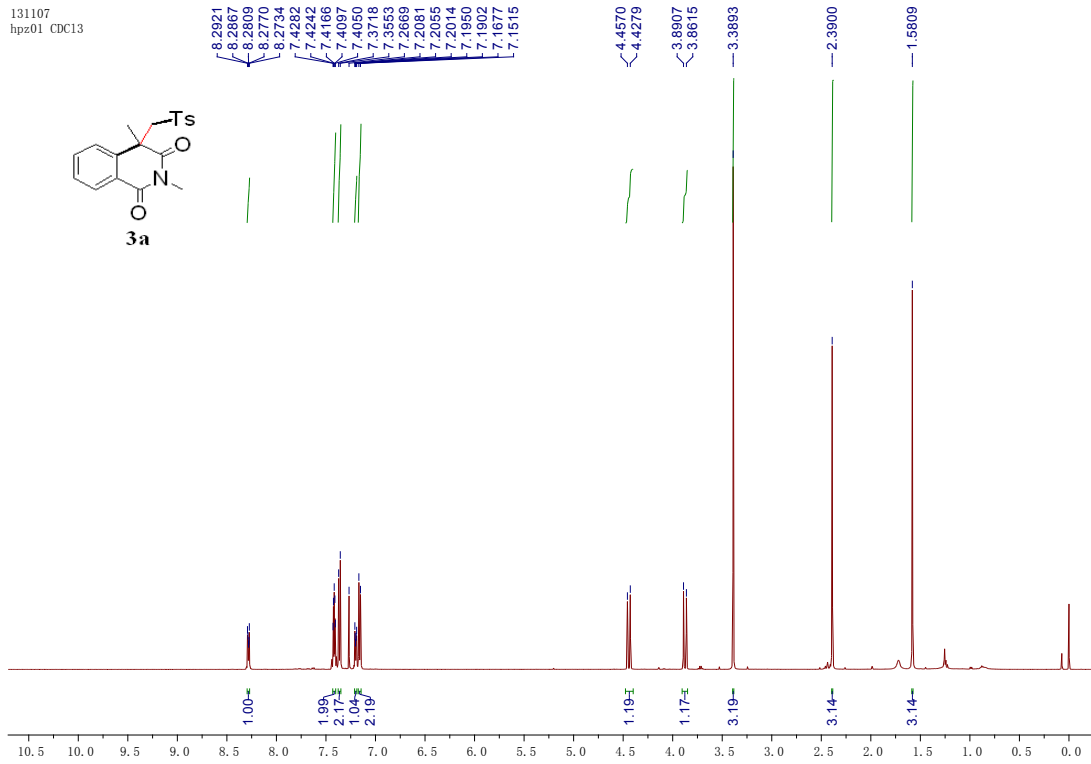

131111  
HPZ01 CDC13

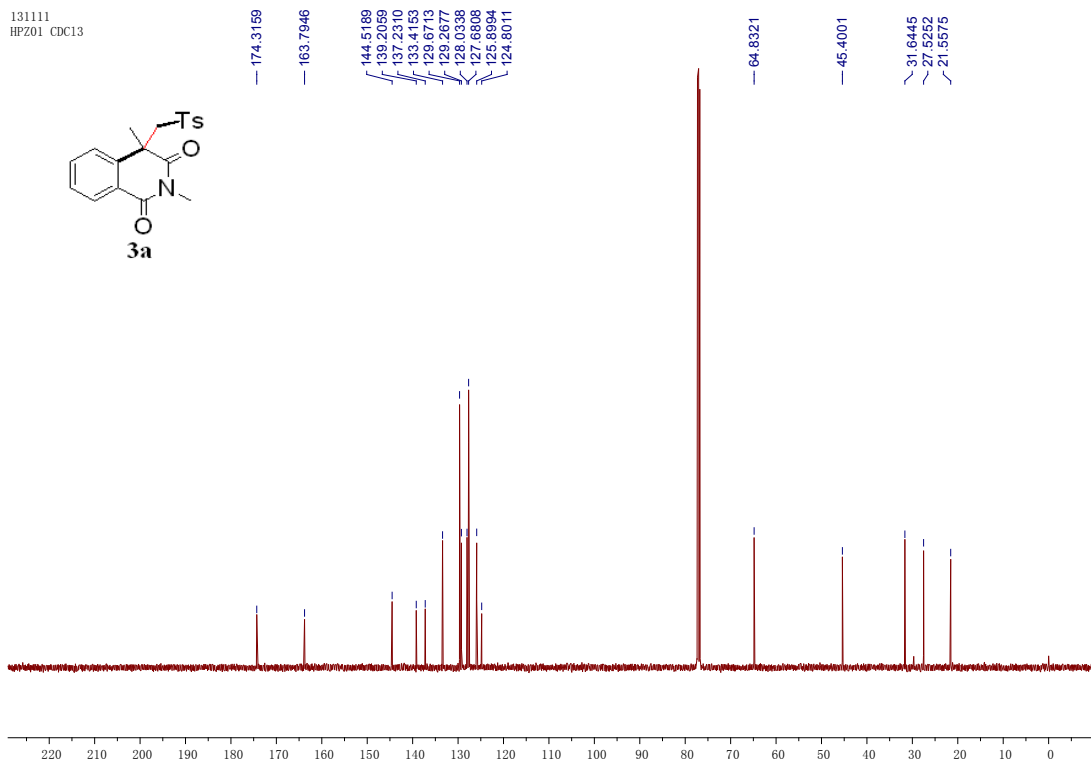

131128  
HPZ02 CDC13

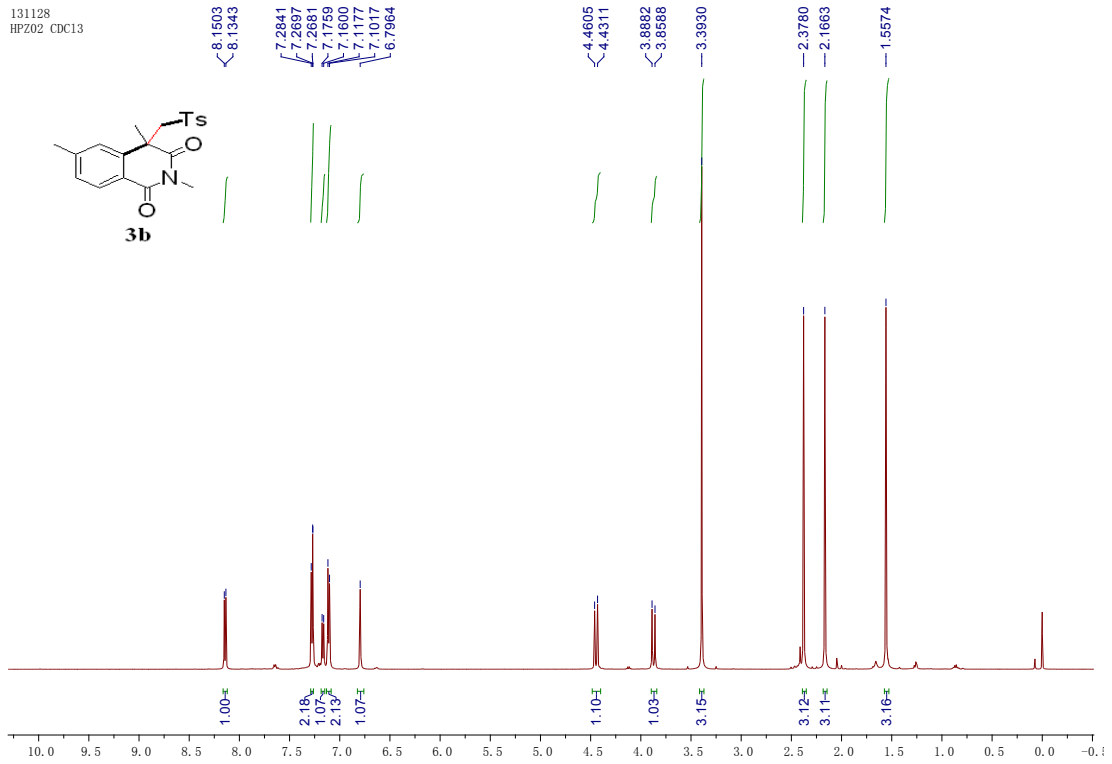

131202  
hpz02 CDC13

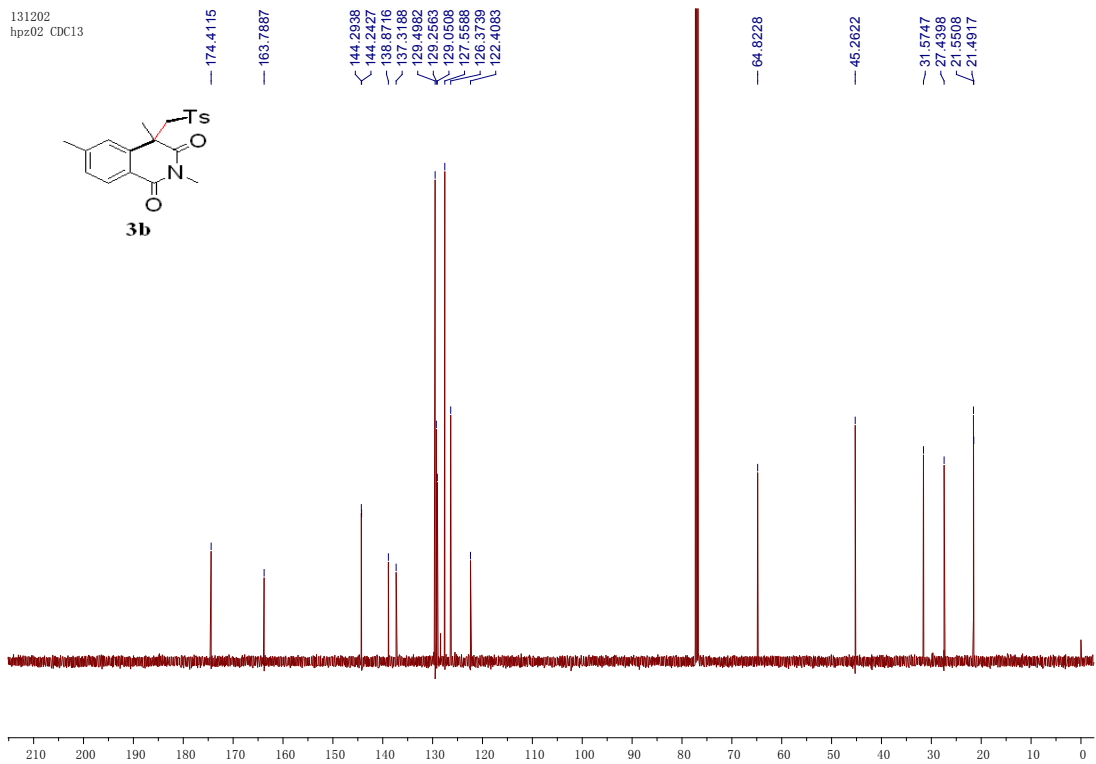

131205  
HPZ05 CDC13

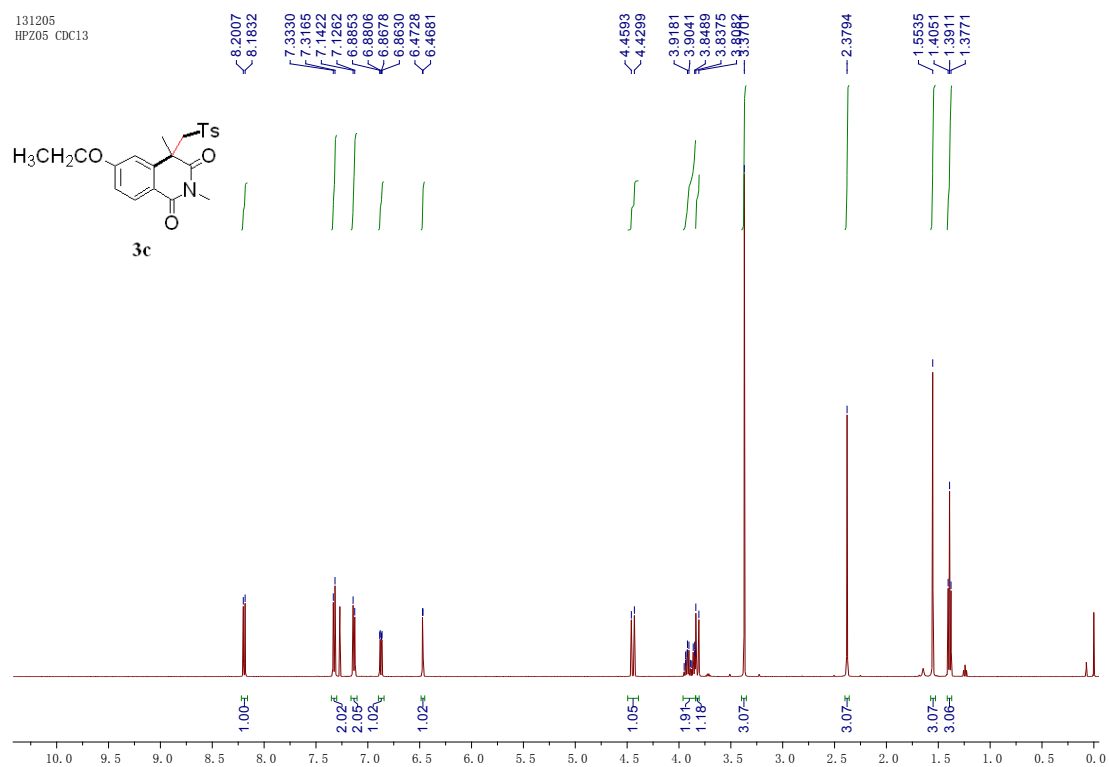

131205  
HPZ05 CDC13

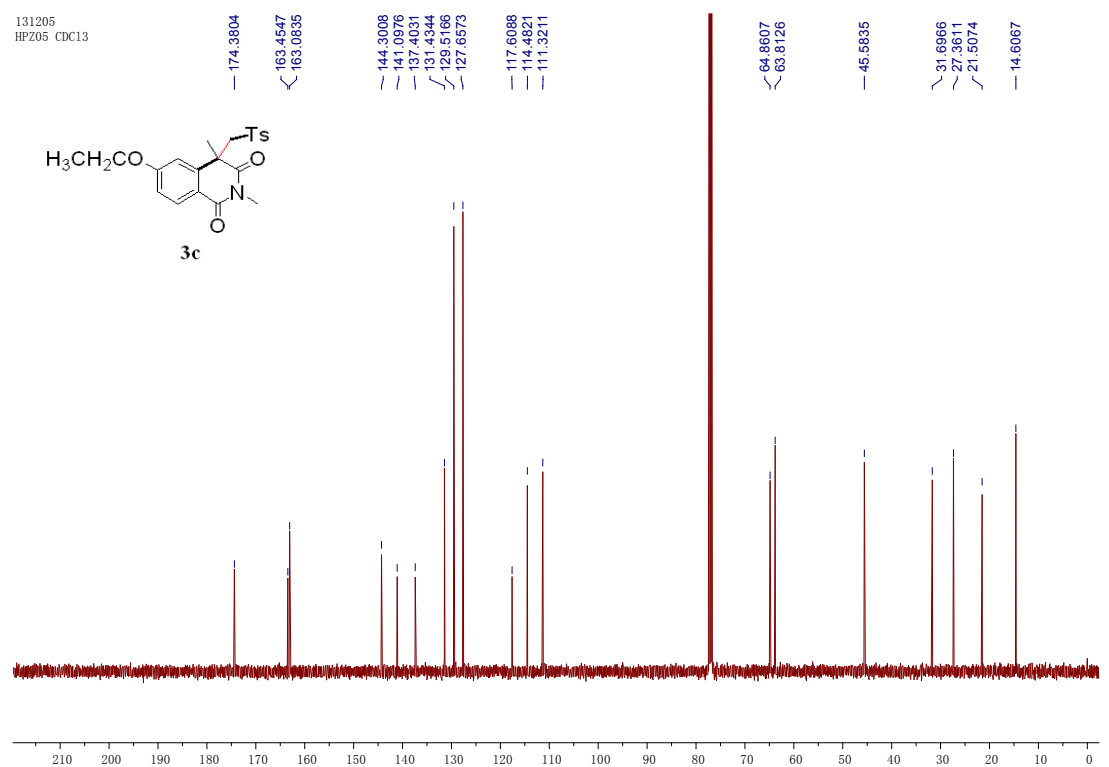

141224  
hpz117 CDC13

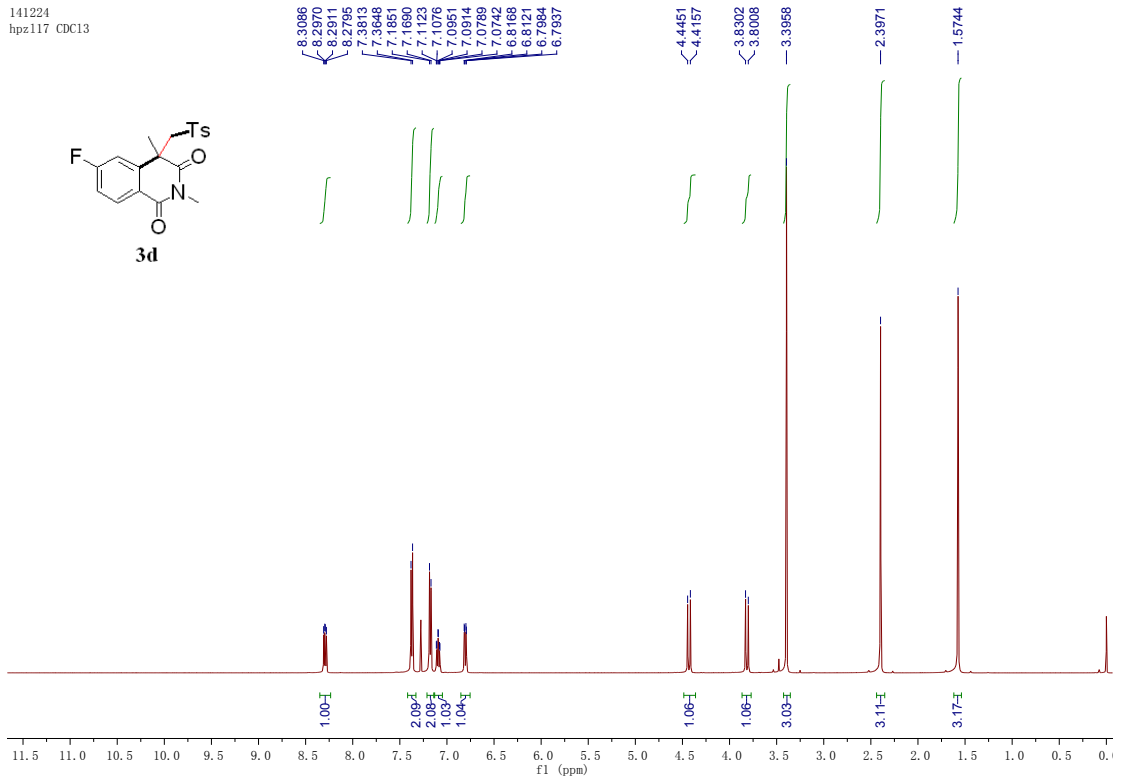

140526  
HPZ17 CDC13

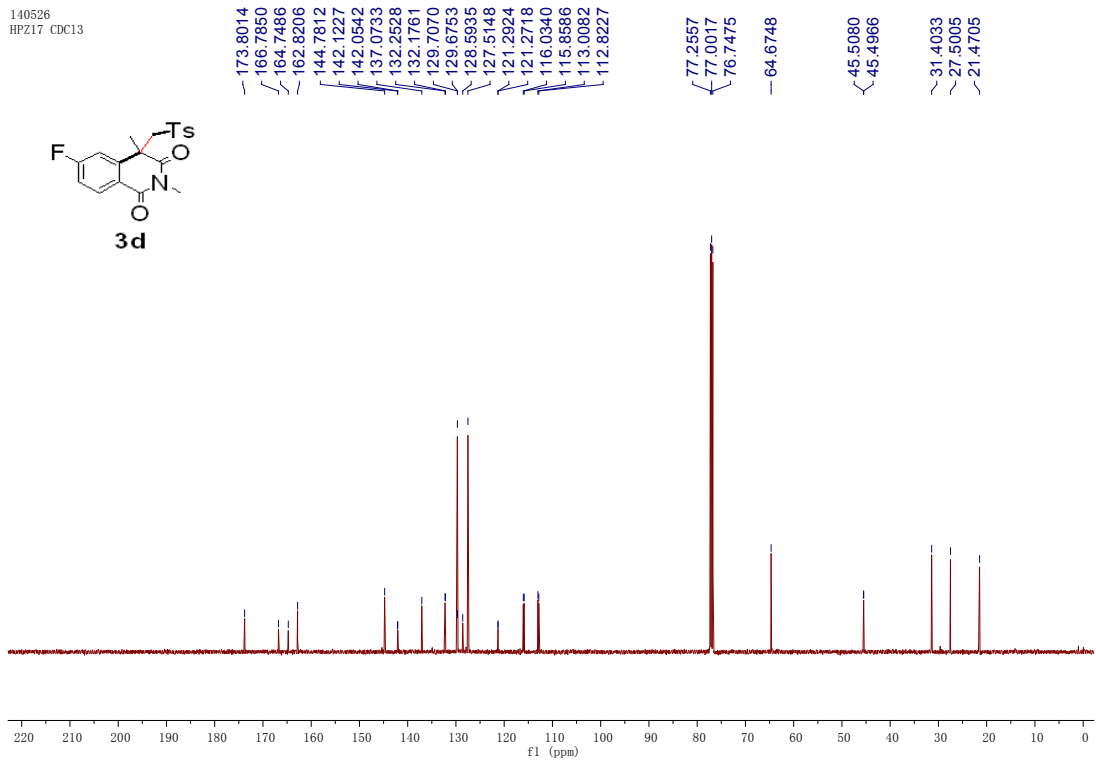

HPZ17-F19  
HPZ17 CDC13 F19

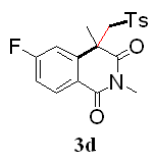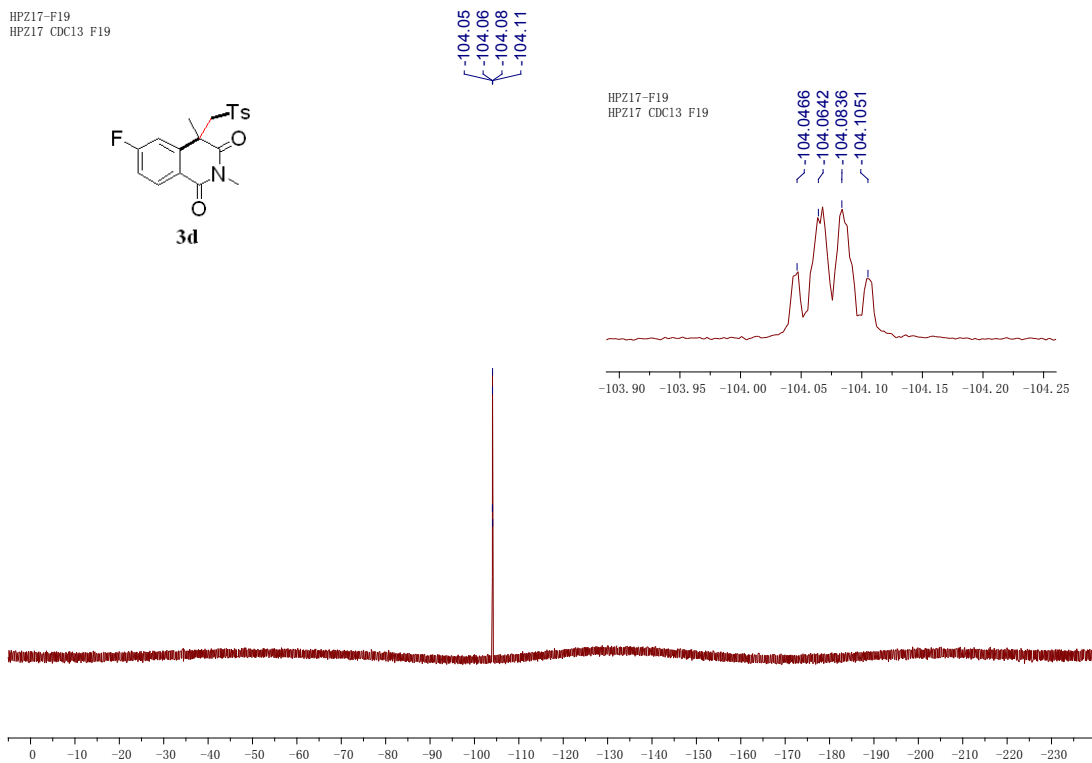

131205  
HPZ04 CDC13

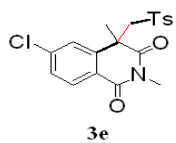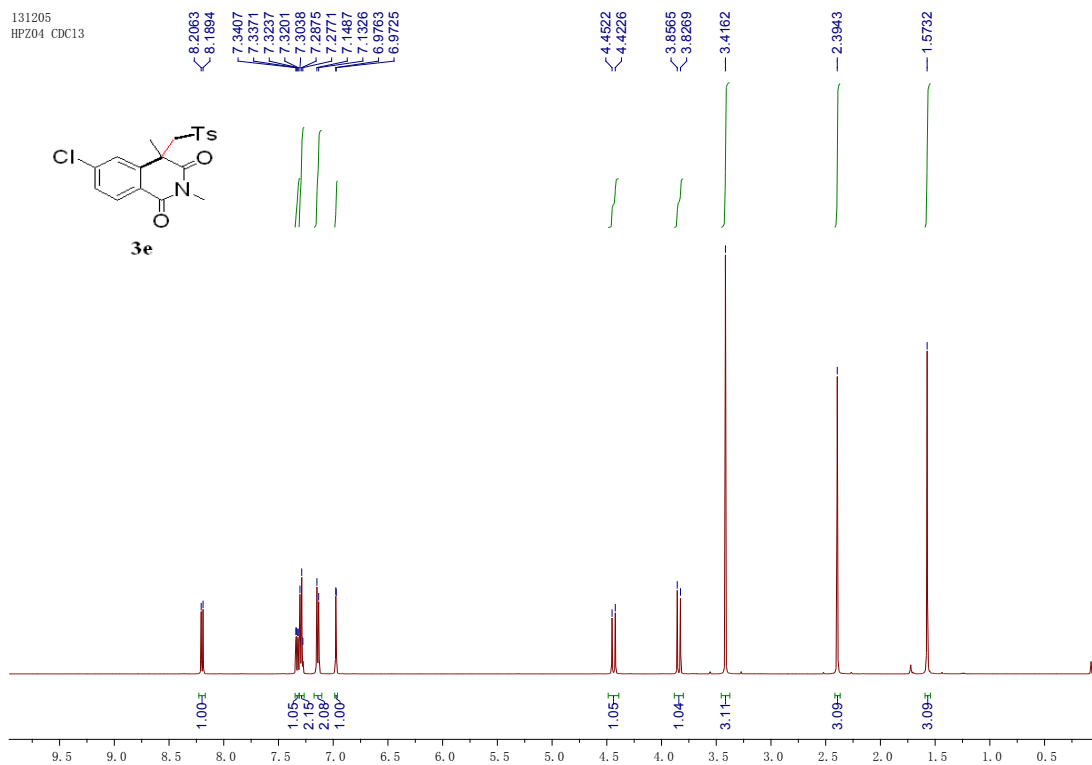

131205  
HPZ04 CDC13

173.70  
162.95  
144.84  
140.59  
140.07  
136.95  
130.76  
129.77  
128.60  
127.33  
126.24  
123.42

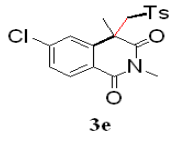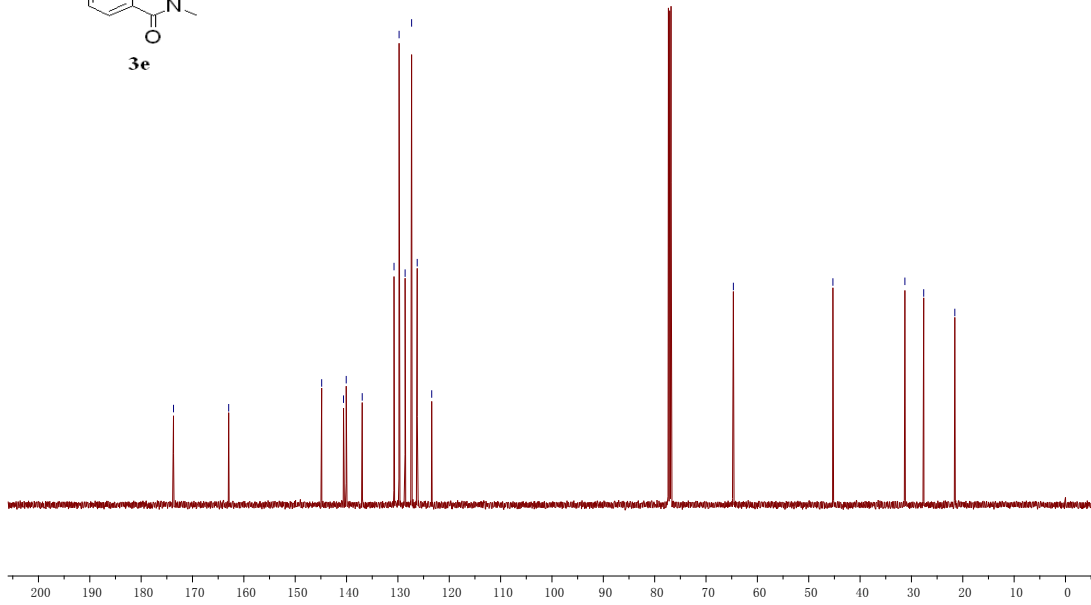

131219  
HPZ20 CDC13

8.4955  
8.4782  
8.2185  
8.2143  
8.2012  
8.1970  
7.9121  
7.9079  
7.3350  
7.3184  
7.1544  
7.1384

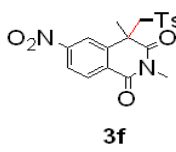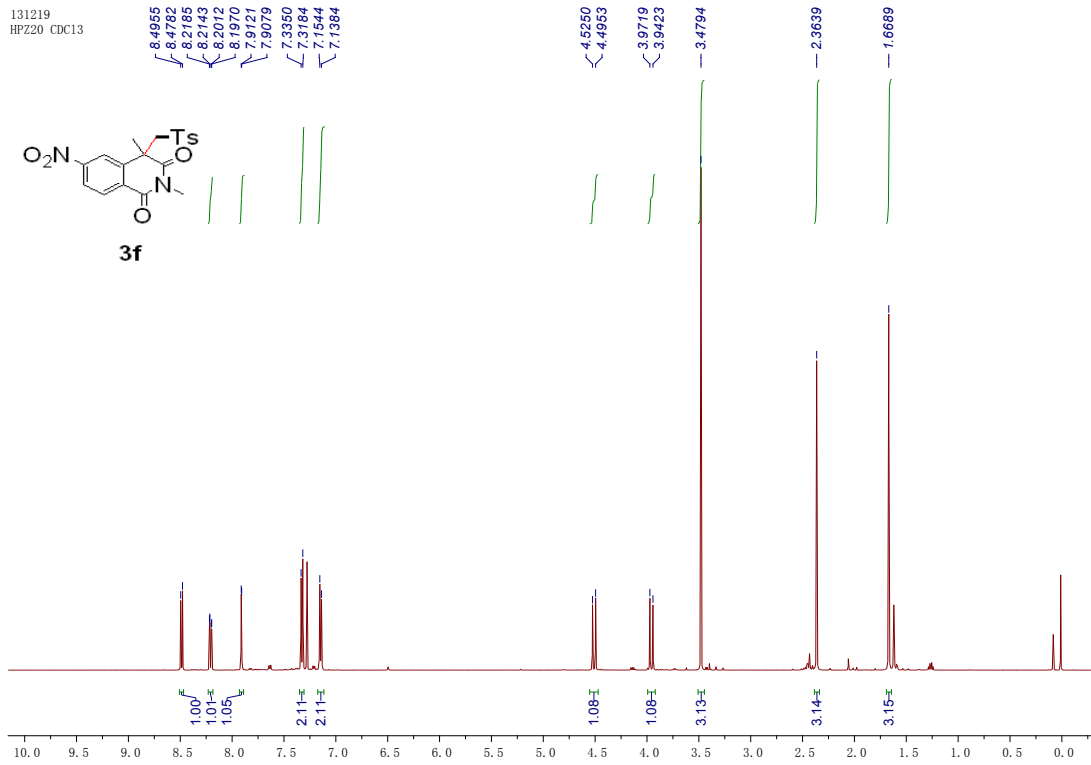

131220  
hpz20 CDCl3

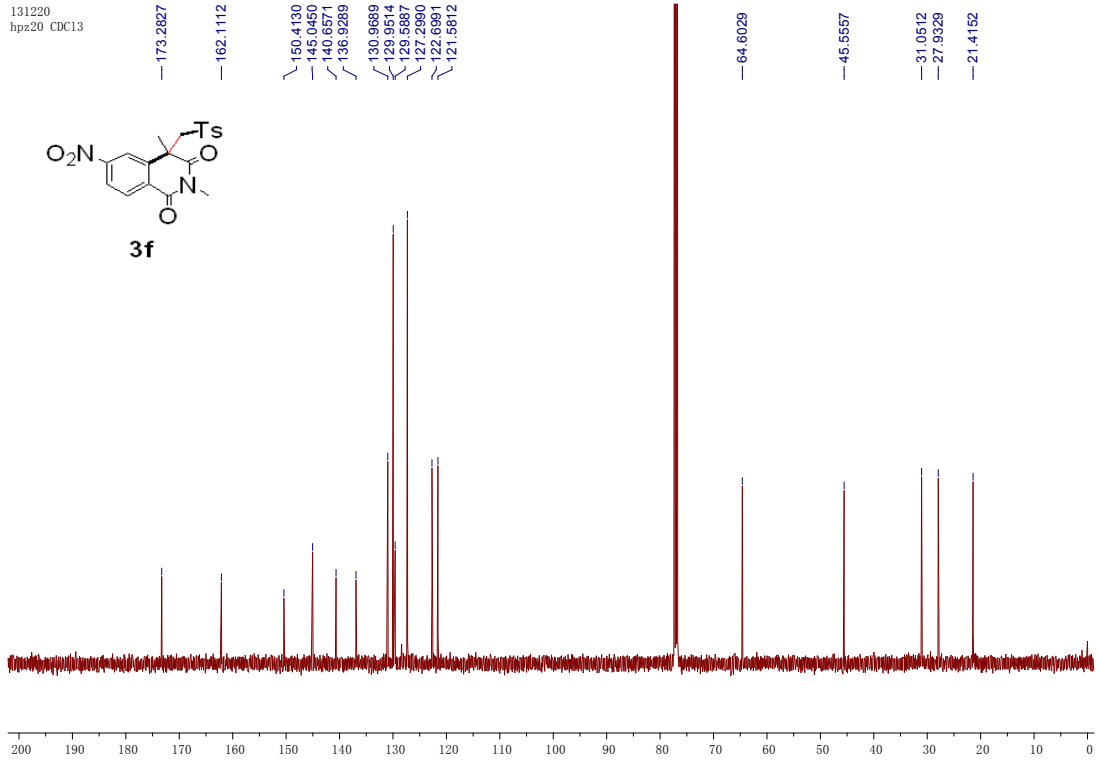

131206  
hpz13 CDCl3

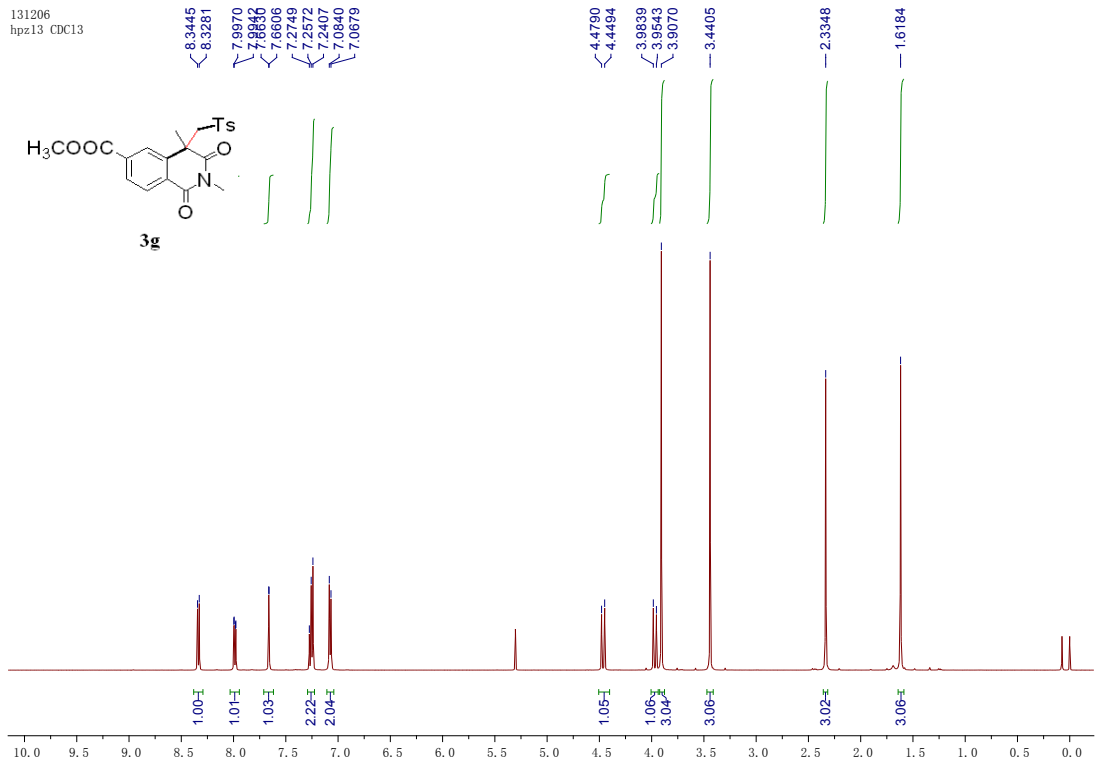



131206  
hpz13 CDCl3

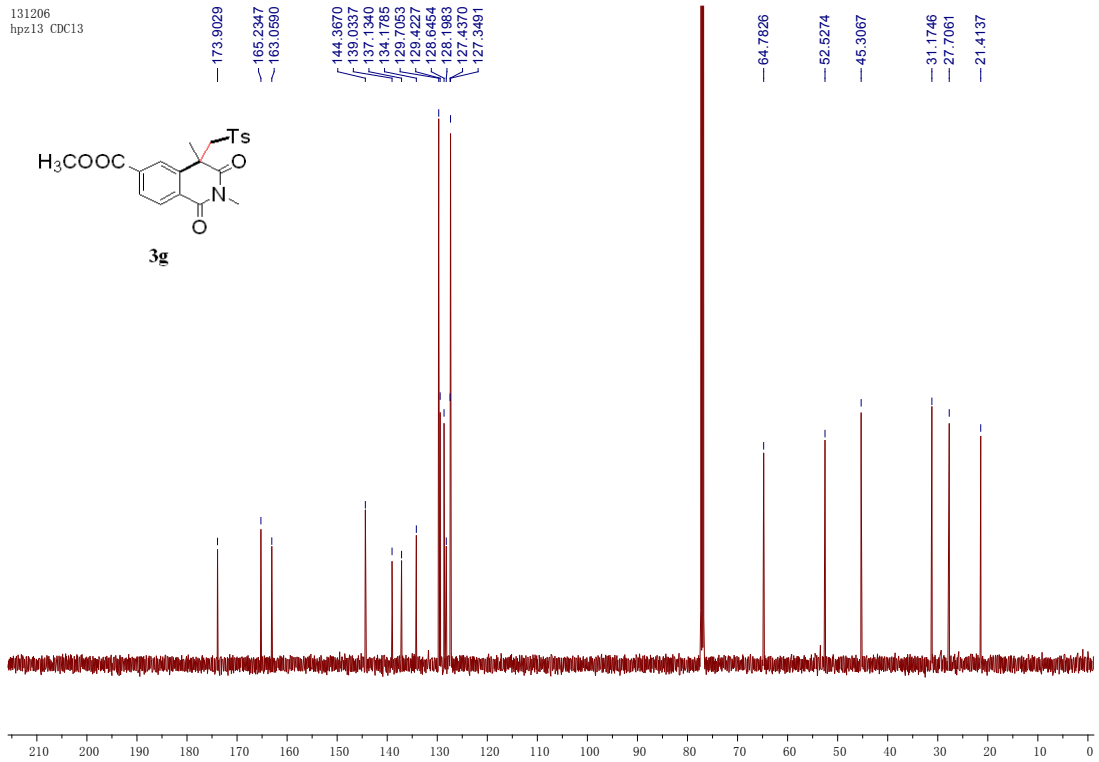

131202  
HPZ06 CDCl3

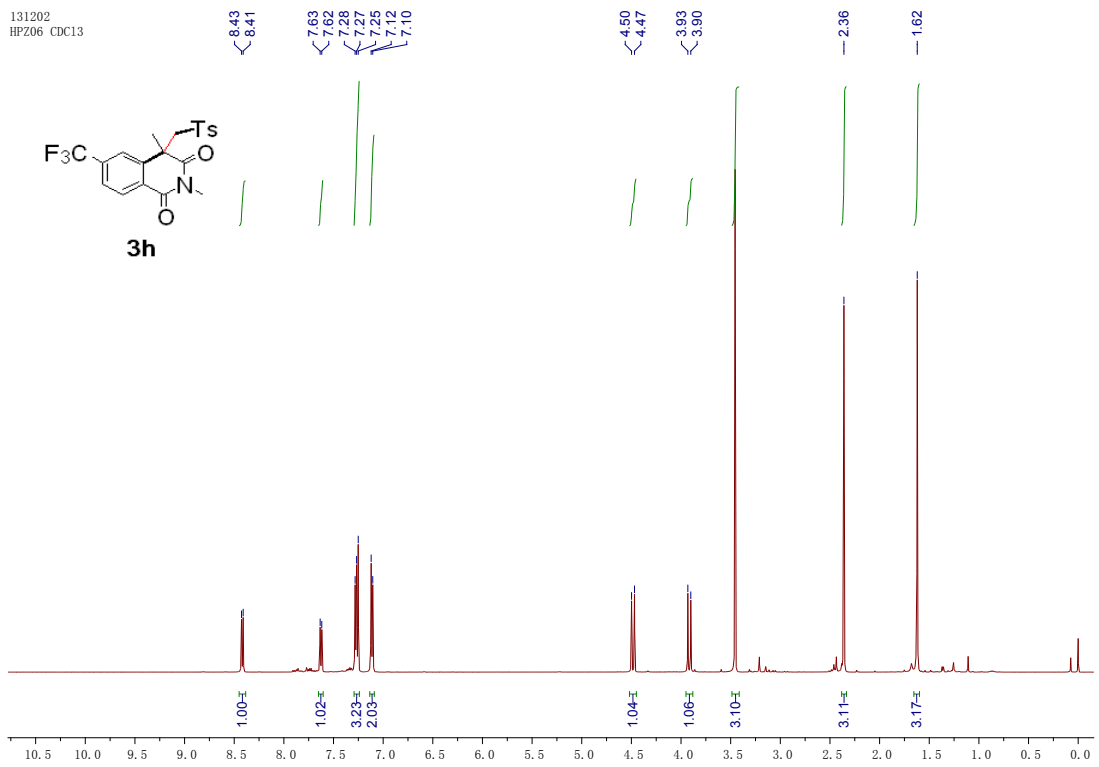

131202  
HPZ06 CDC13

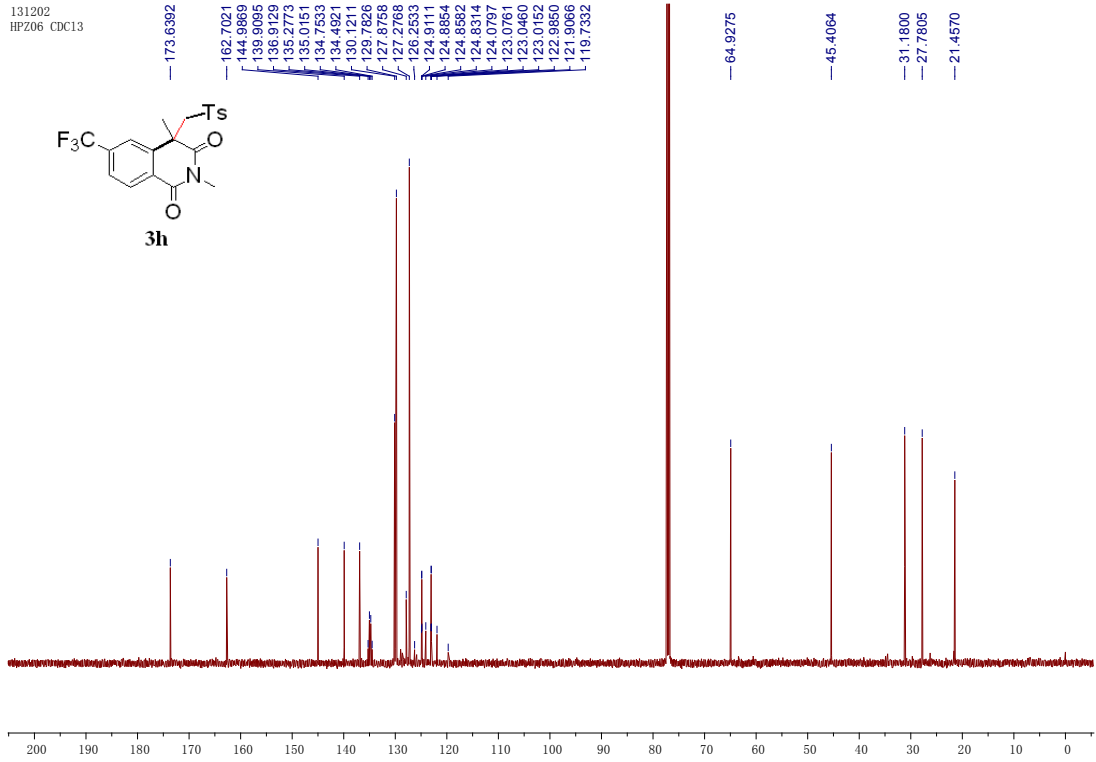

HZP06-F19  
HZP06 CDC13 F19

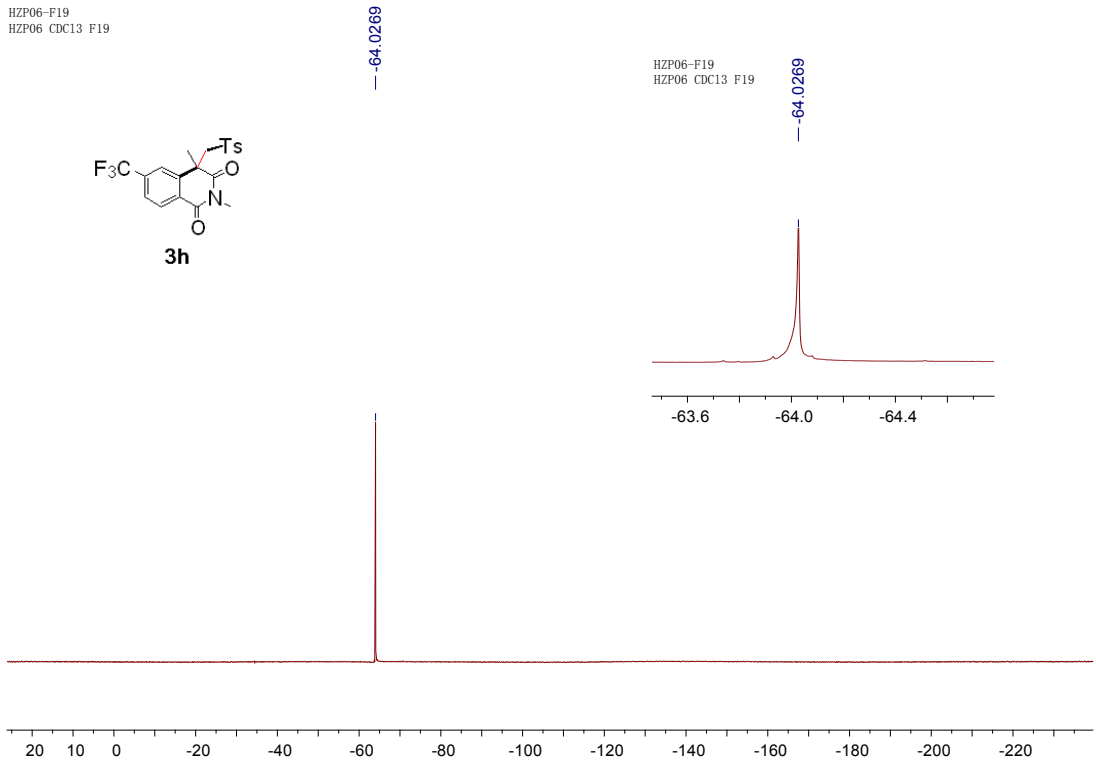

131216  
hpz19 CDC13

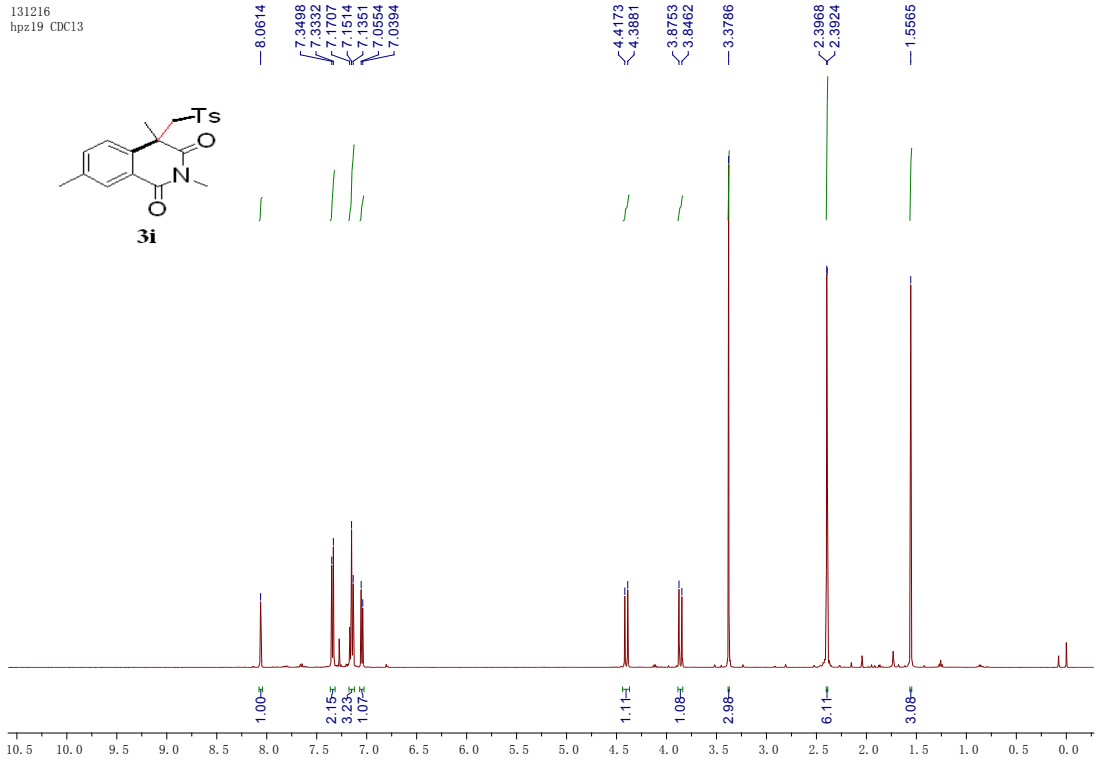

131216  
hpz19 CDC13

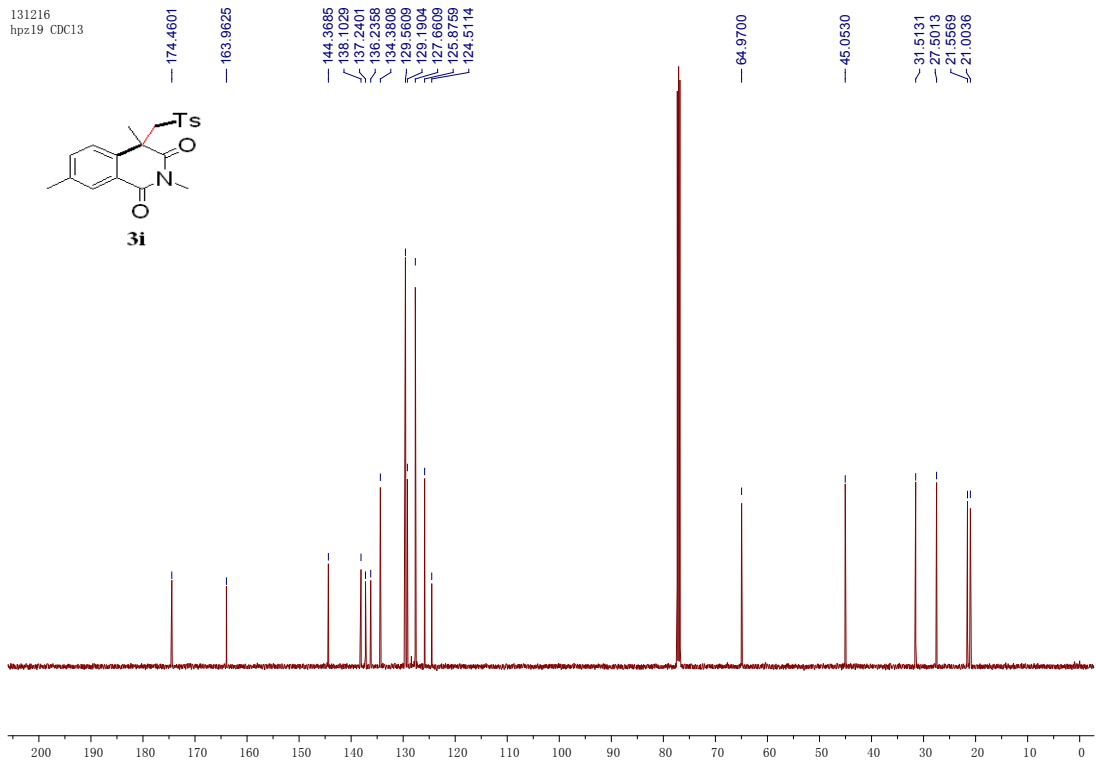

131205  
HPZ12 CDC13

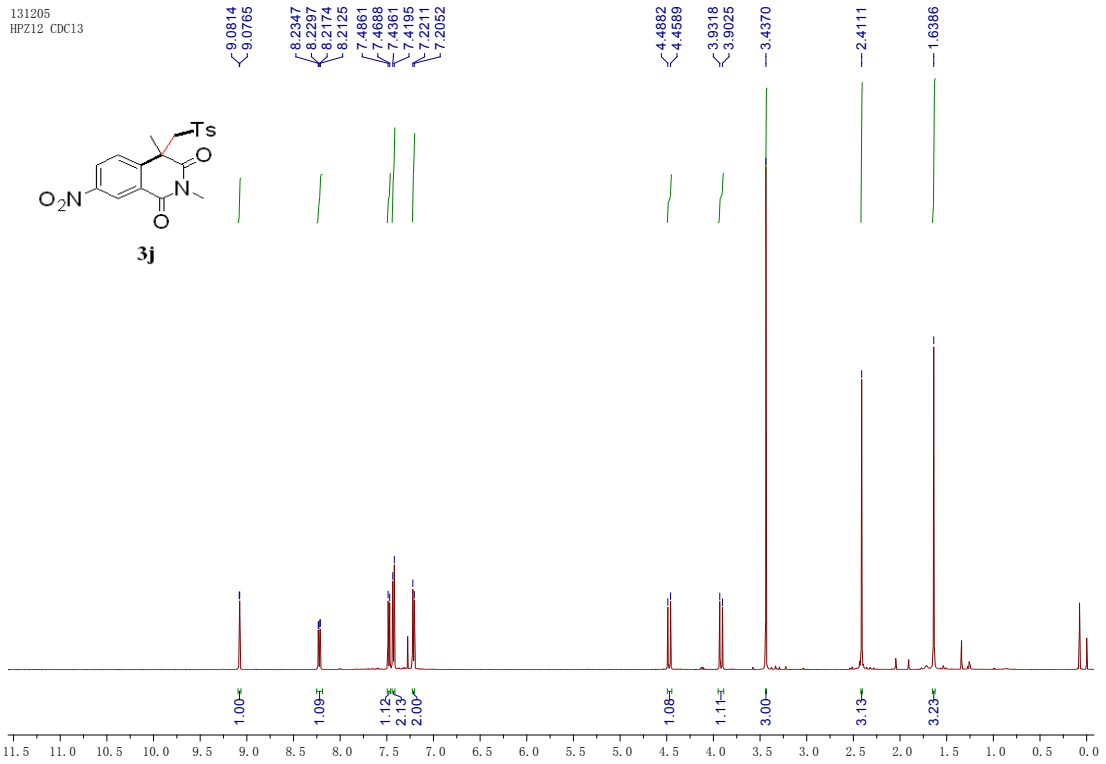

131206  
hpz12 CDC13

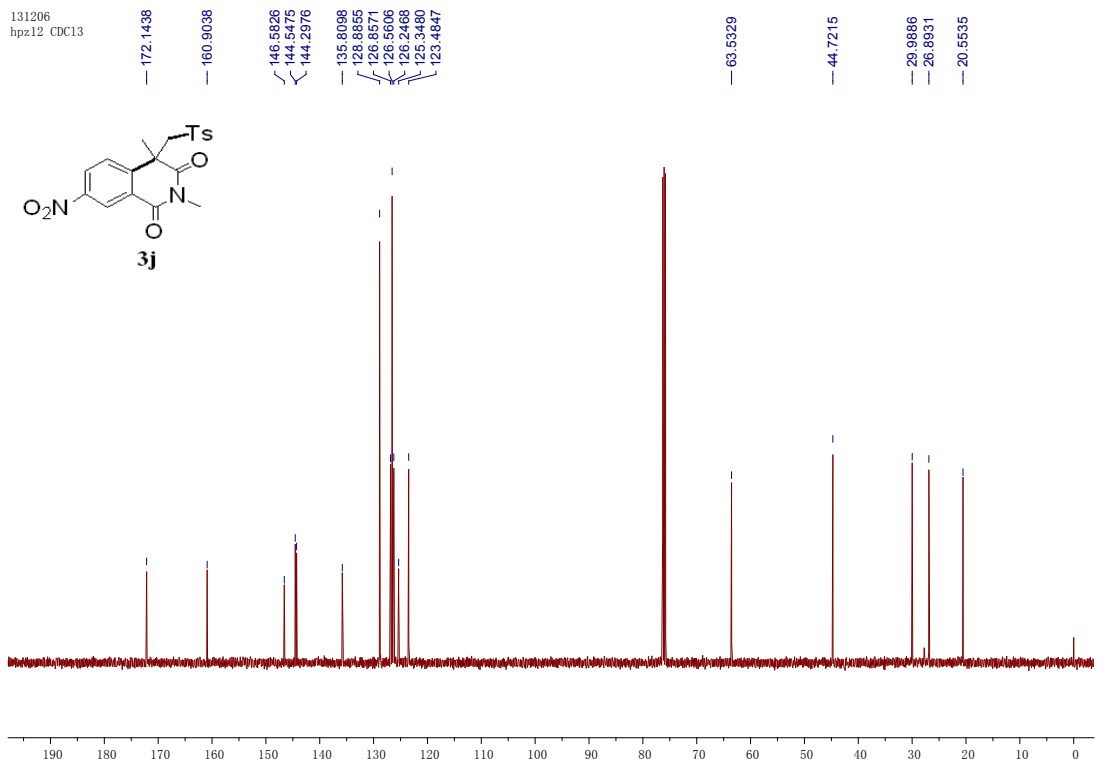

131128  
HPZ03 CDC13

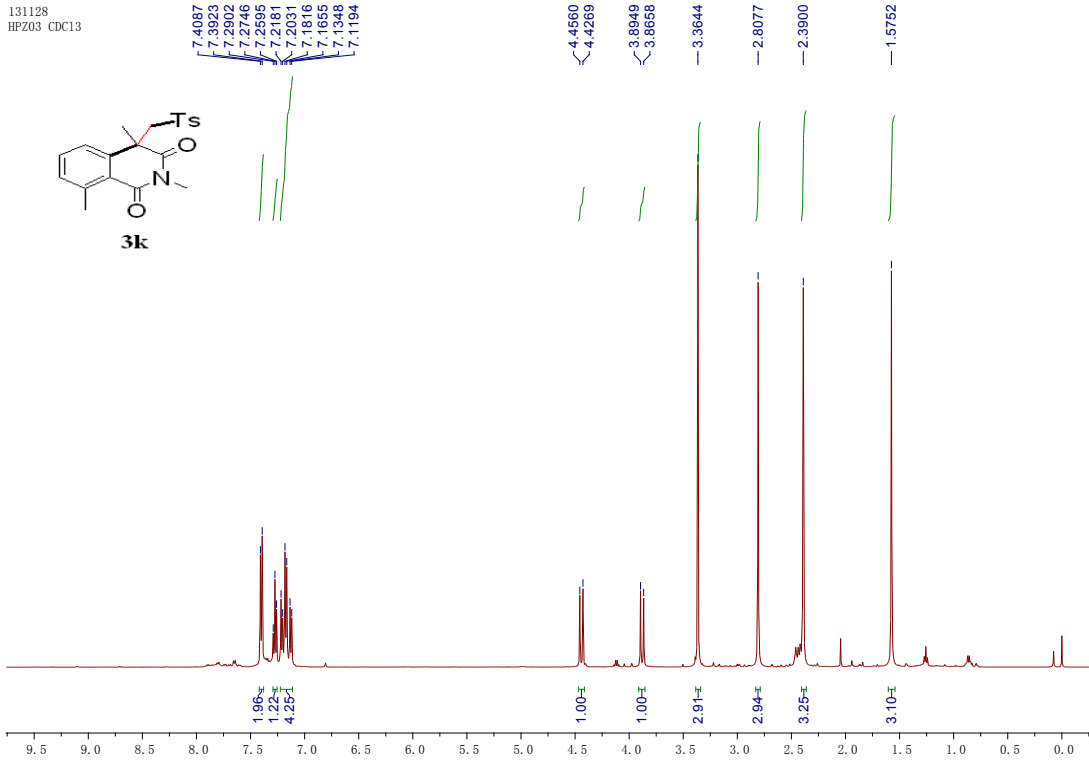

131202  
hpz03 CDC13

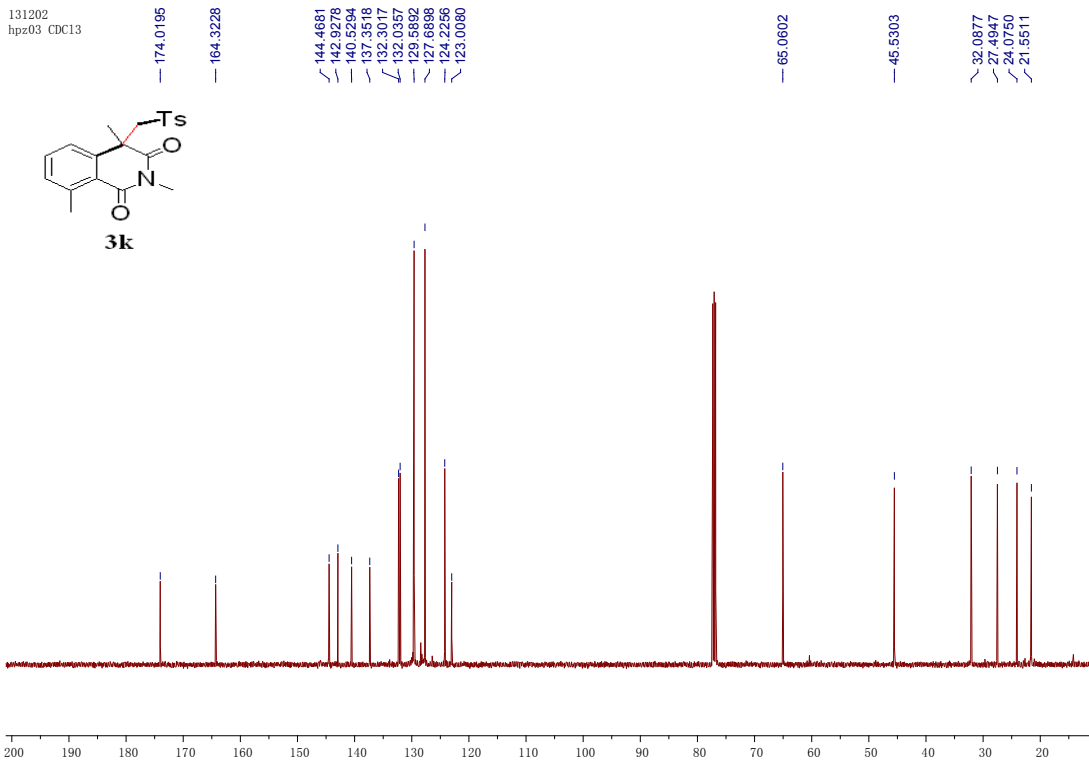

131206  
hpz14 CDC13

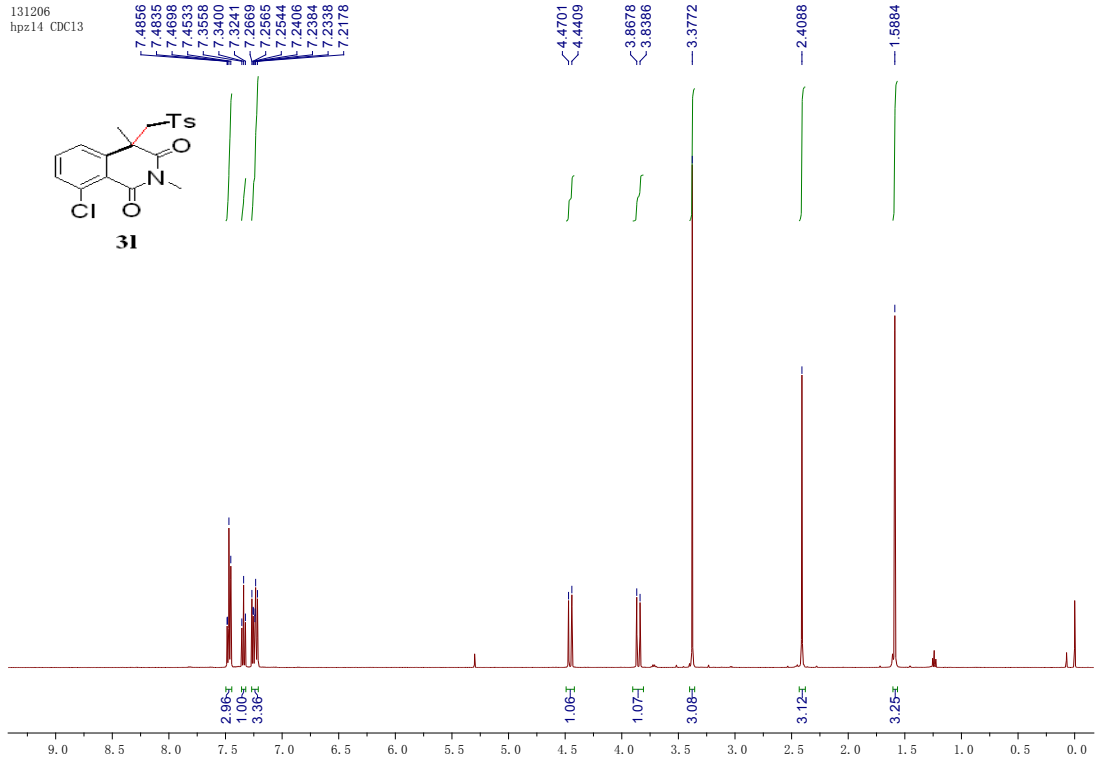

131206  
hpz14 CDC13

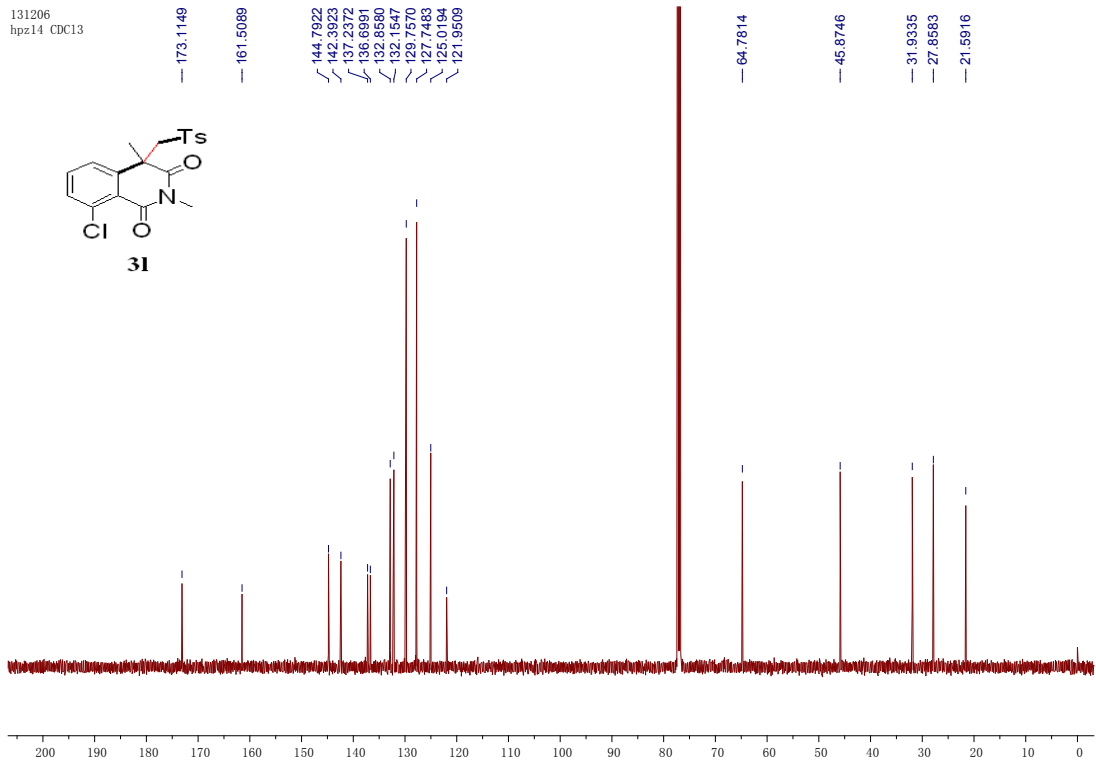

131219  
HPZ21 CDCl3

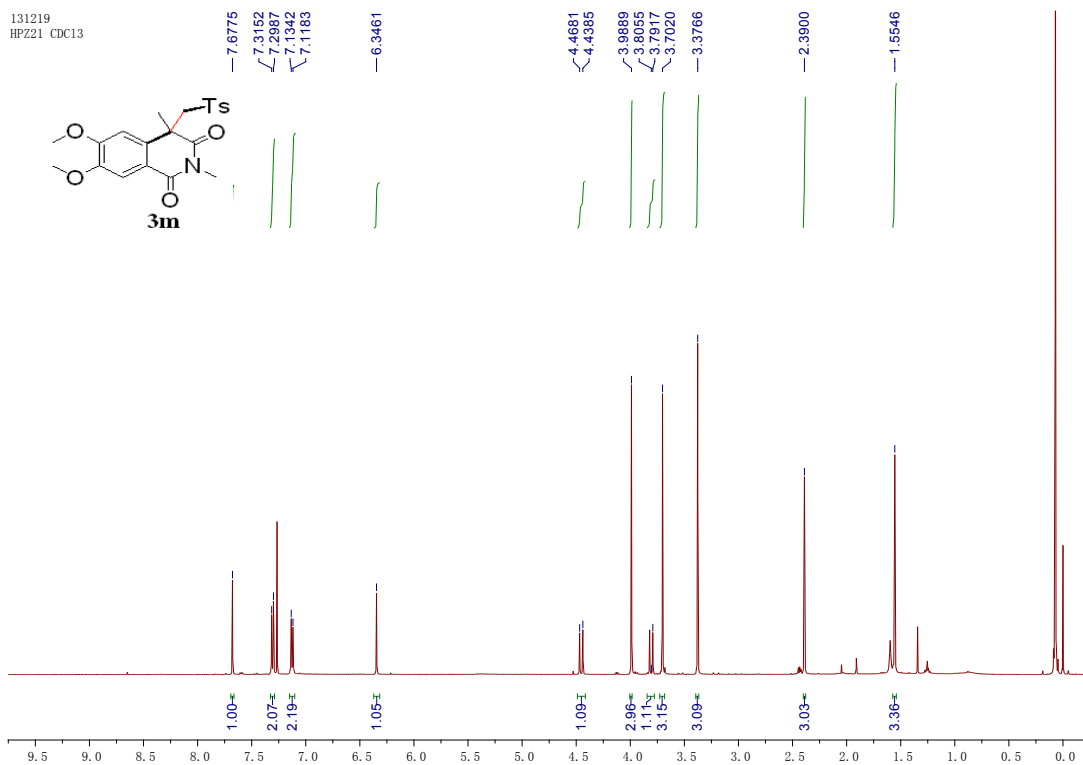

131220  
hpz21 CDCl3

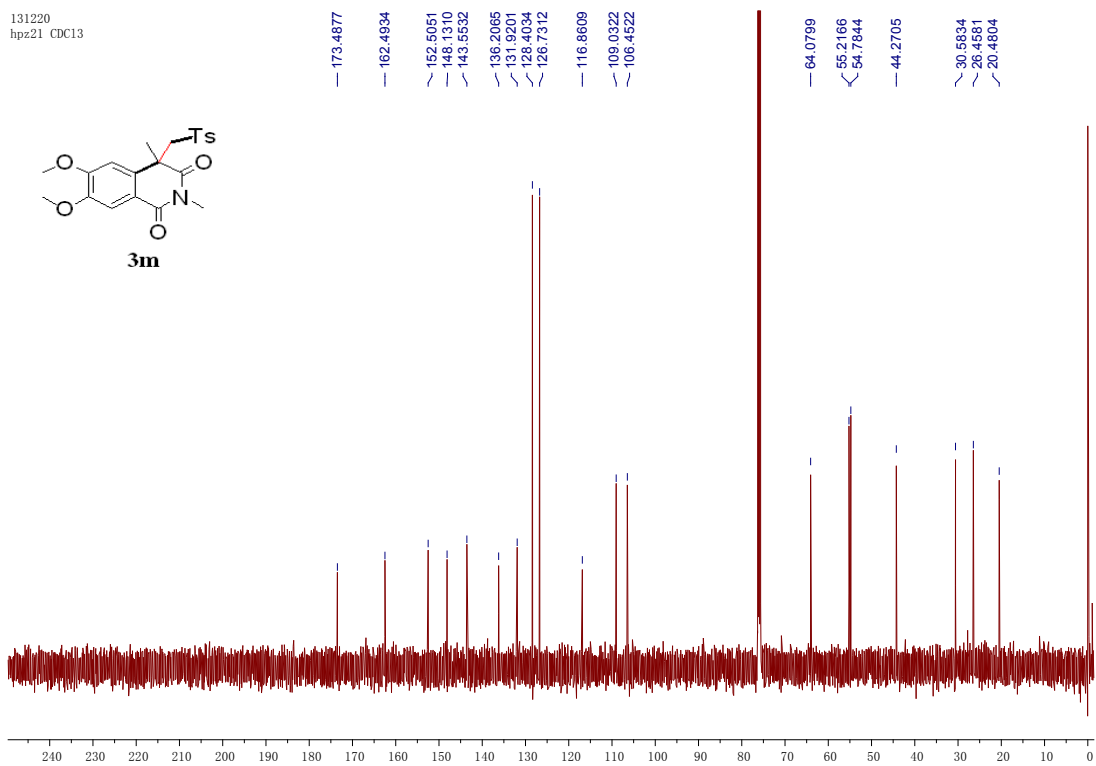

131202  
HPZ07 CDC13

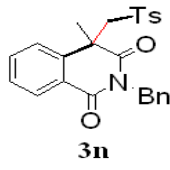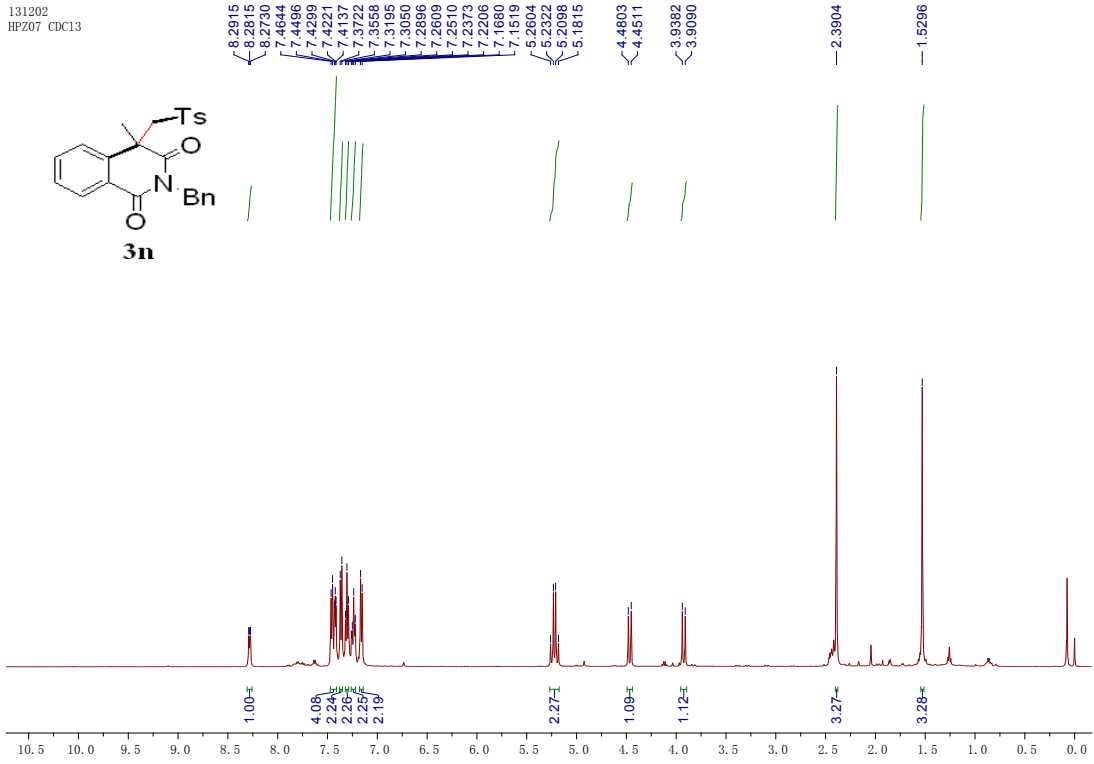

131203  
HPZ07 CDC13

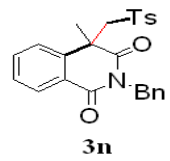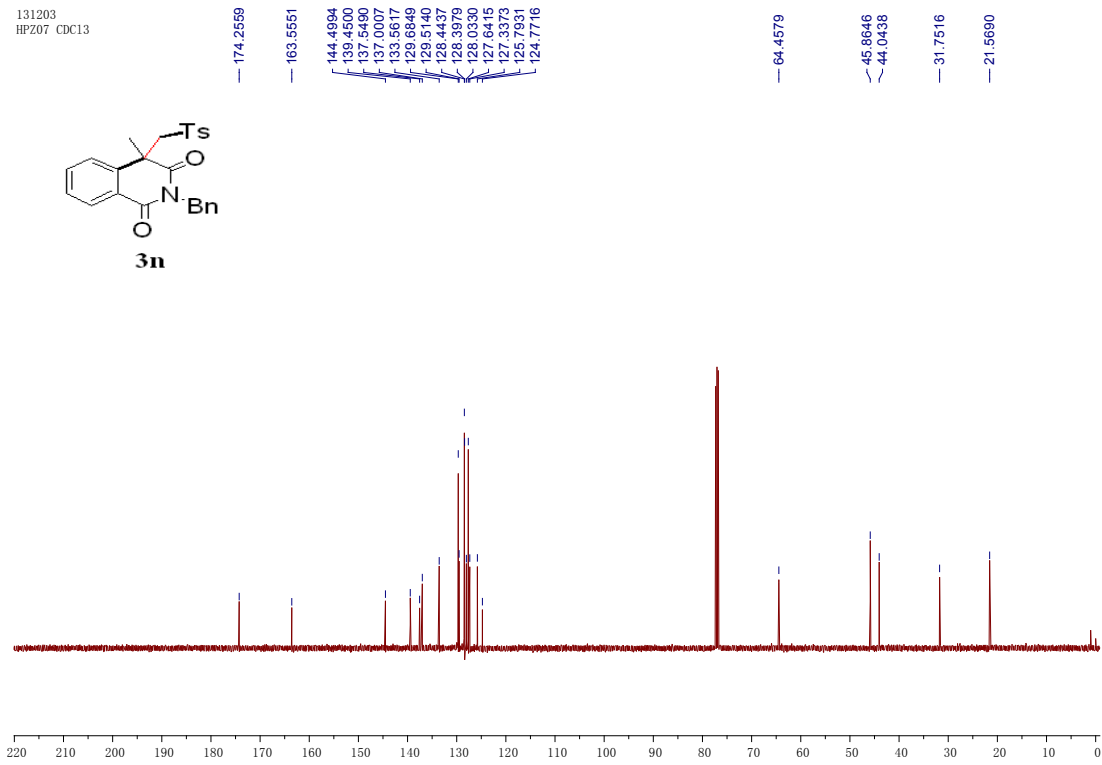



131209  
hpz18 CDCL3

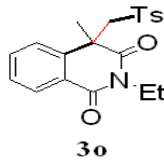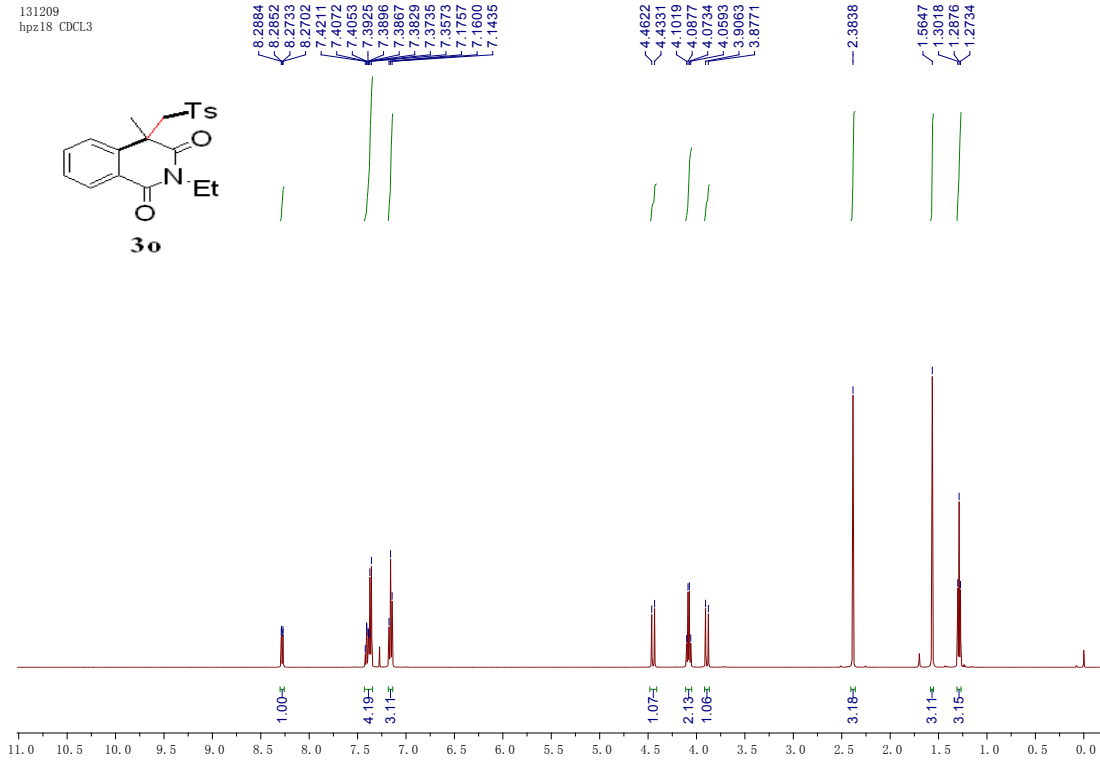

131209  
hpz18 CDCL3

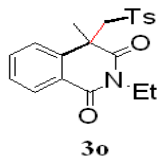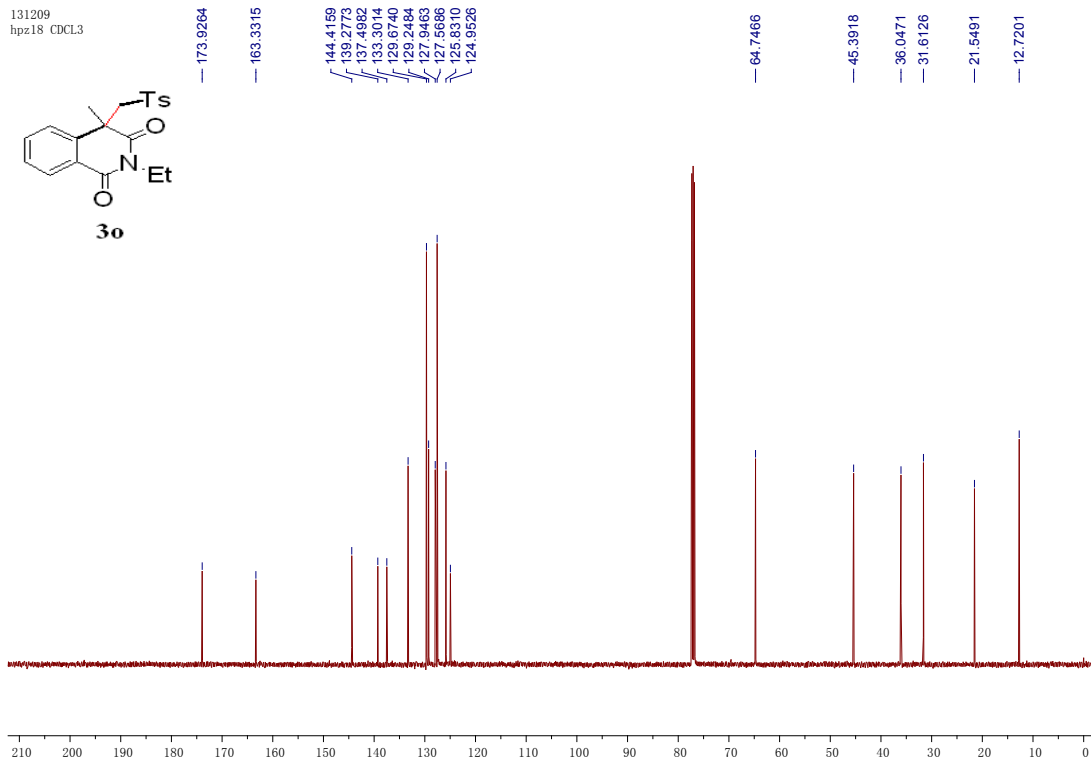

131202  
HPZ08 CDC13

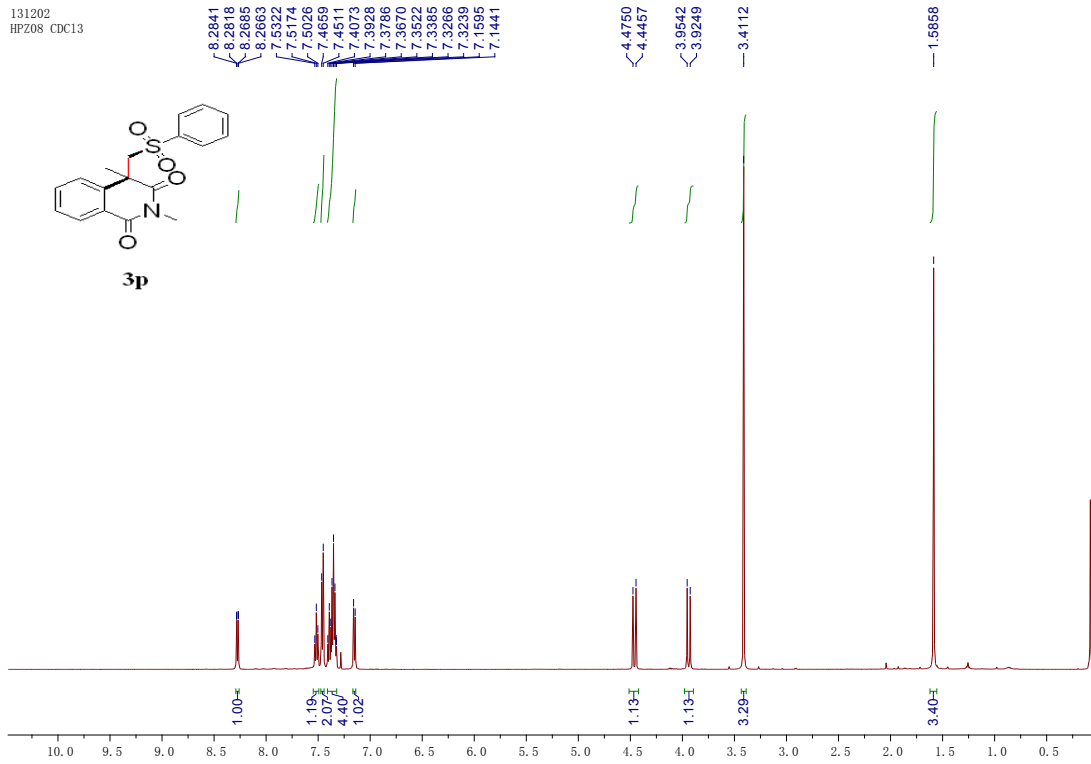

131202  
HPZ08 CDC13

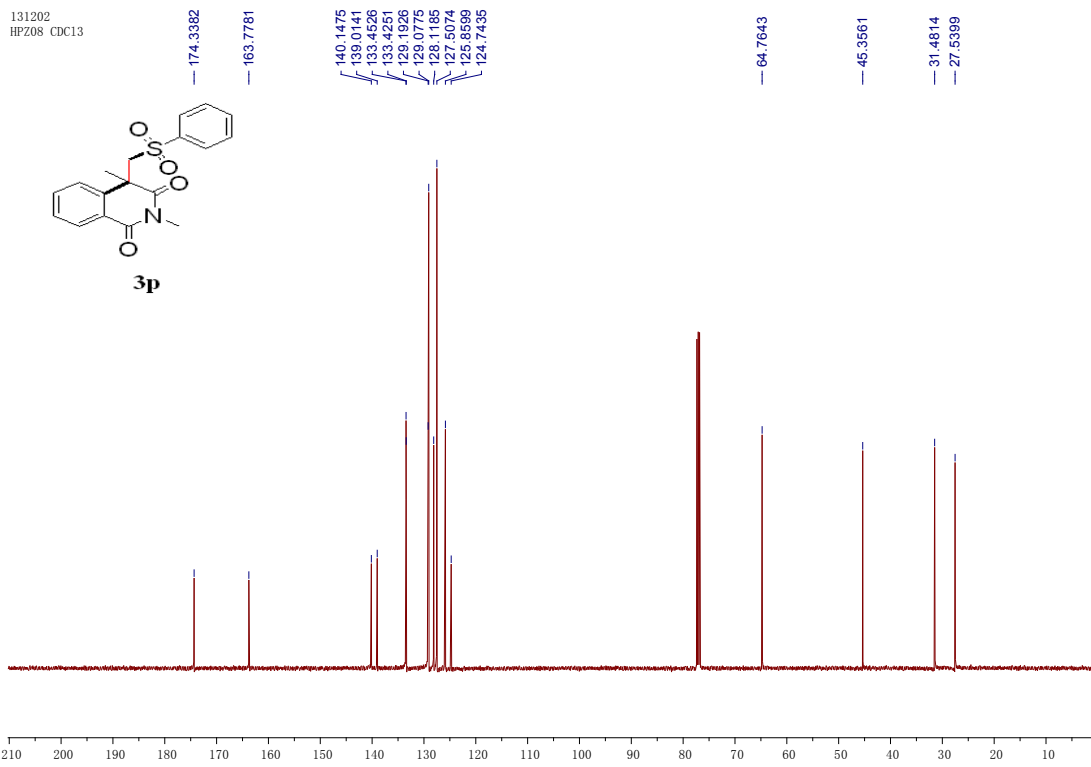

131209  
hpz16 CDCL3

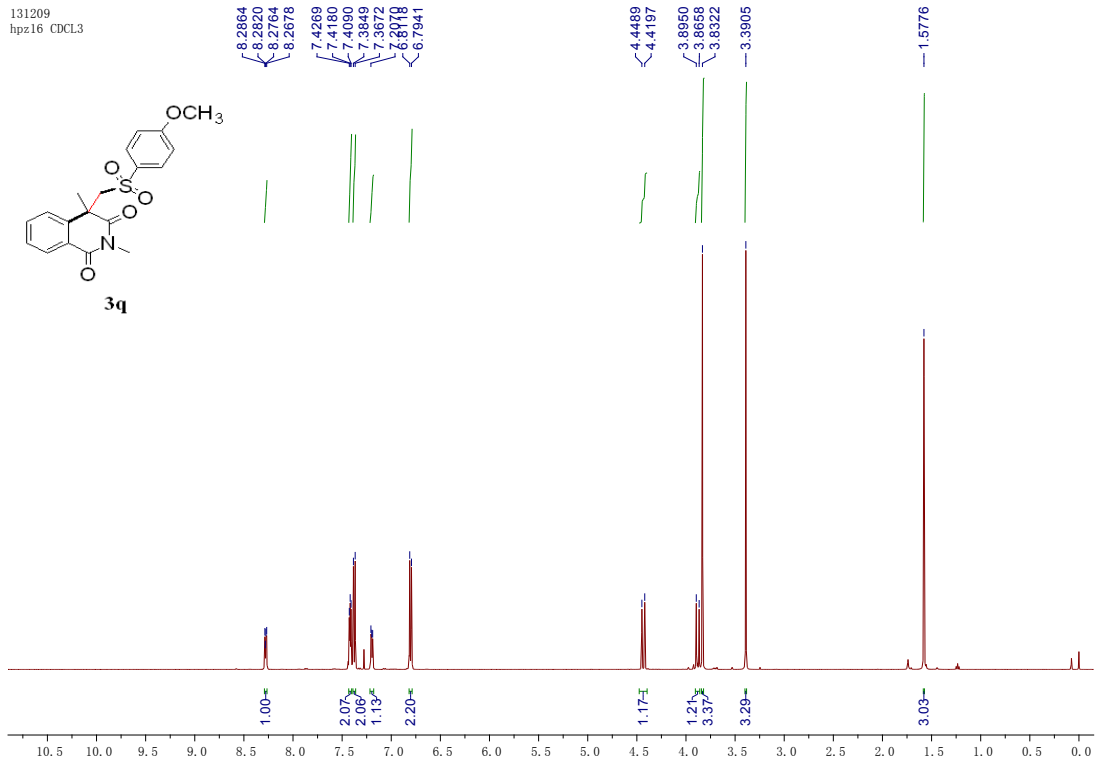

131209  
hpz16 CDCL3

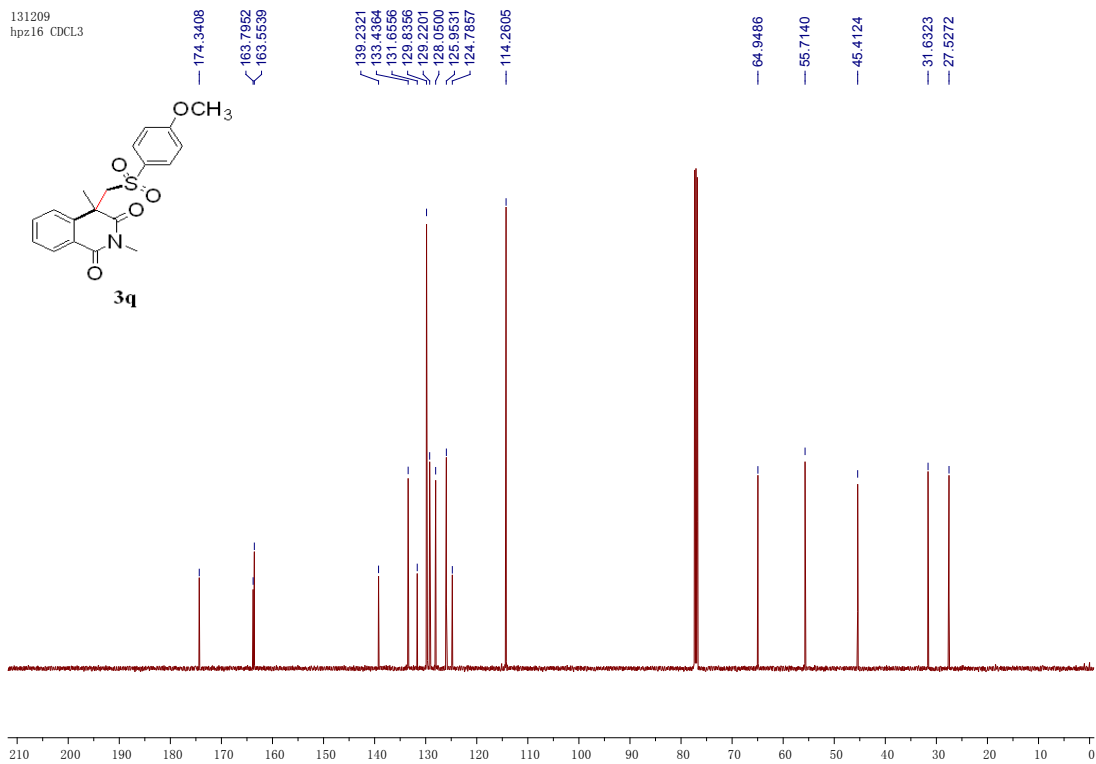

131204  
hpz9 CDC13

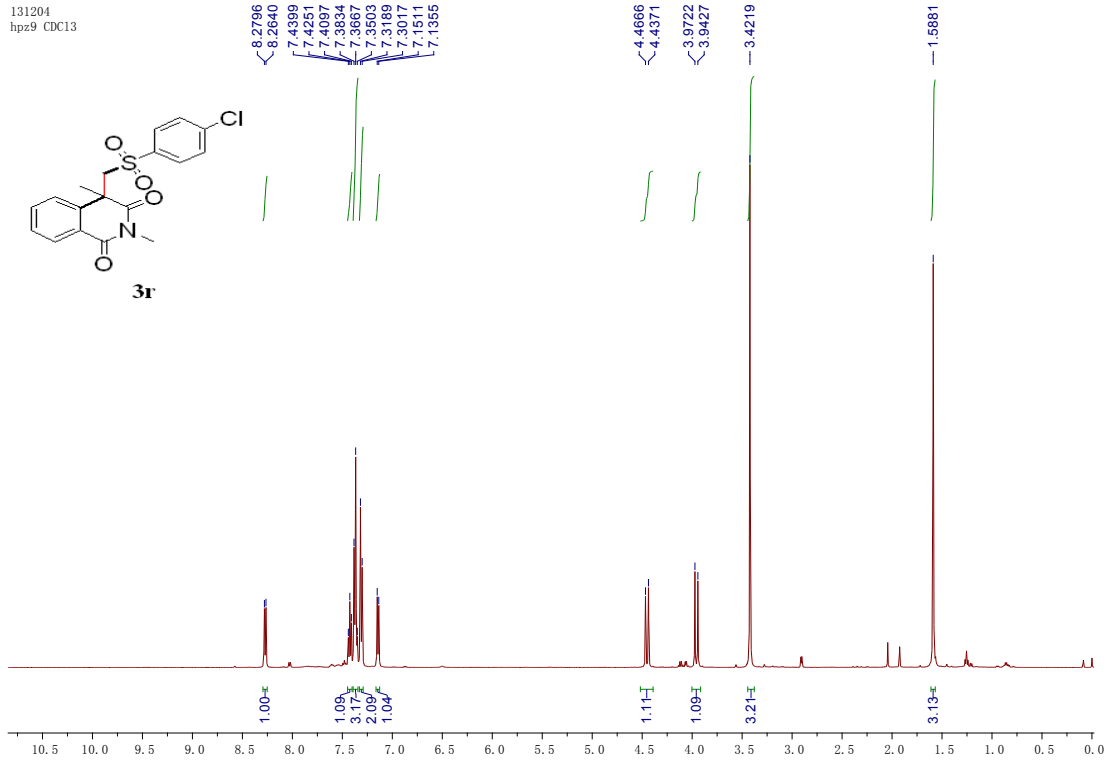

131204  
hpz9 CDC13

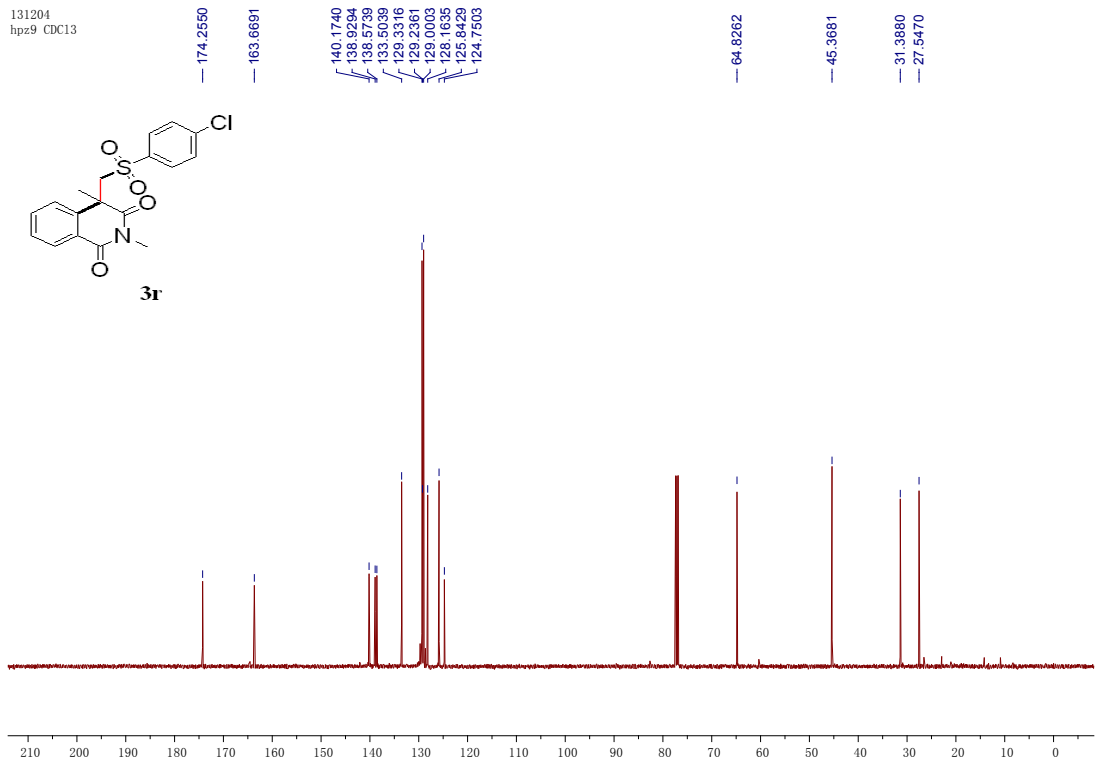

131204  
hpz10 CDC13

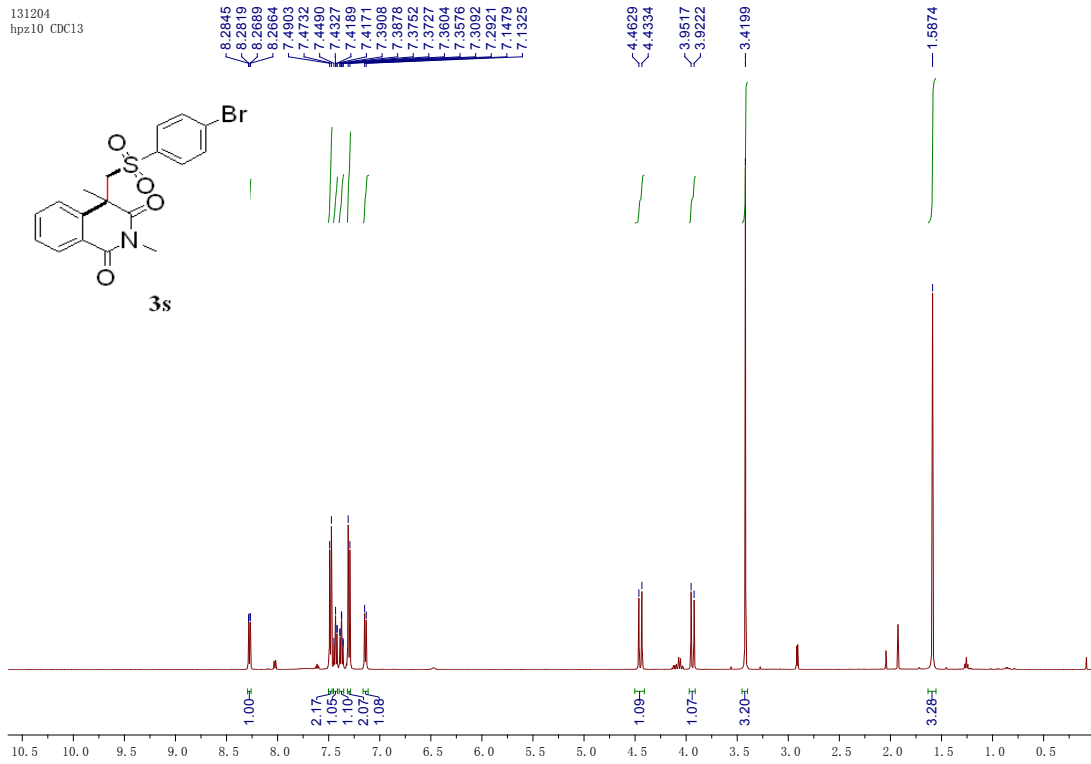

131204  
hpz10 CDC13

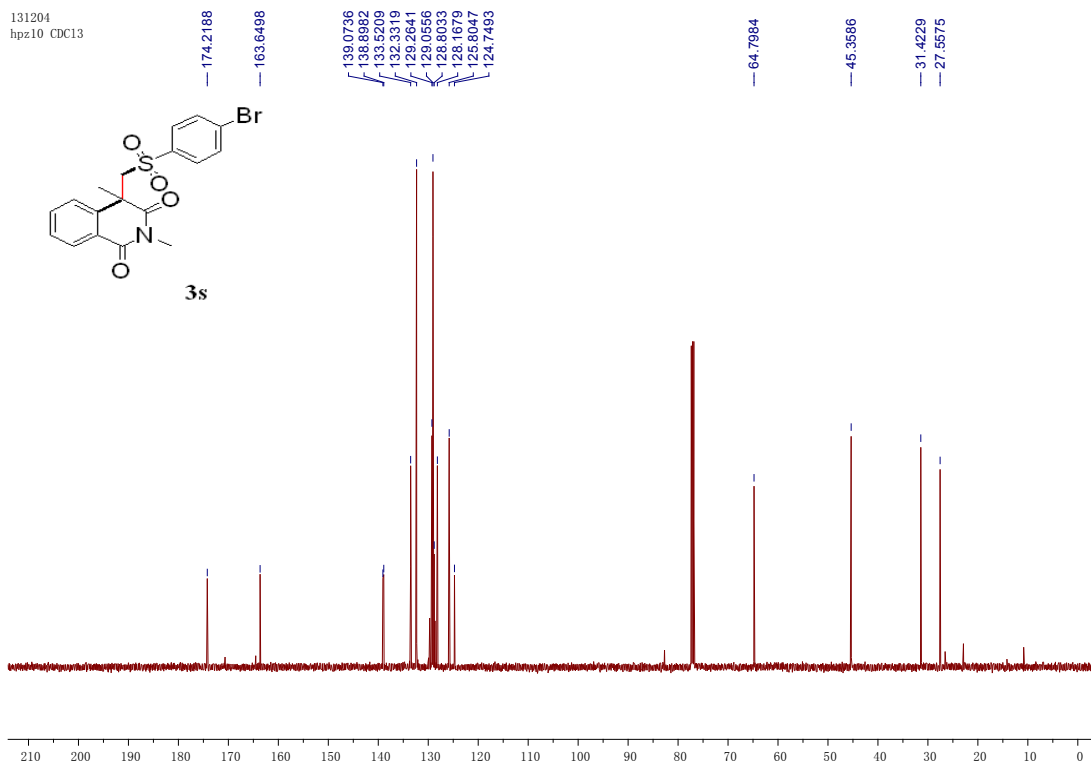

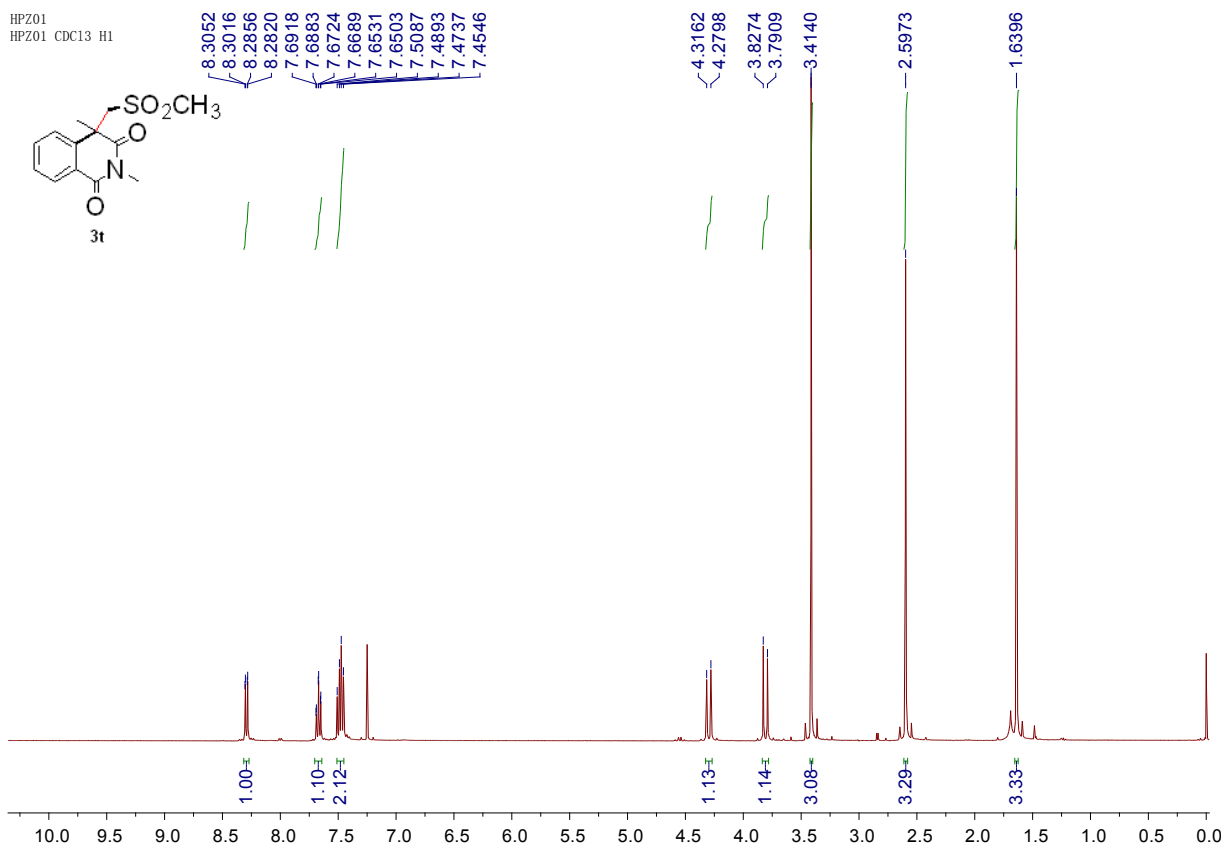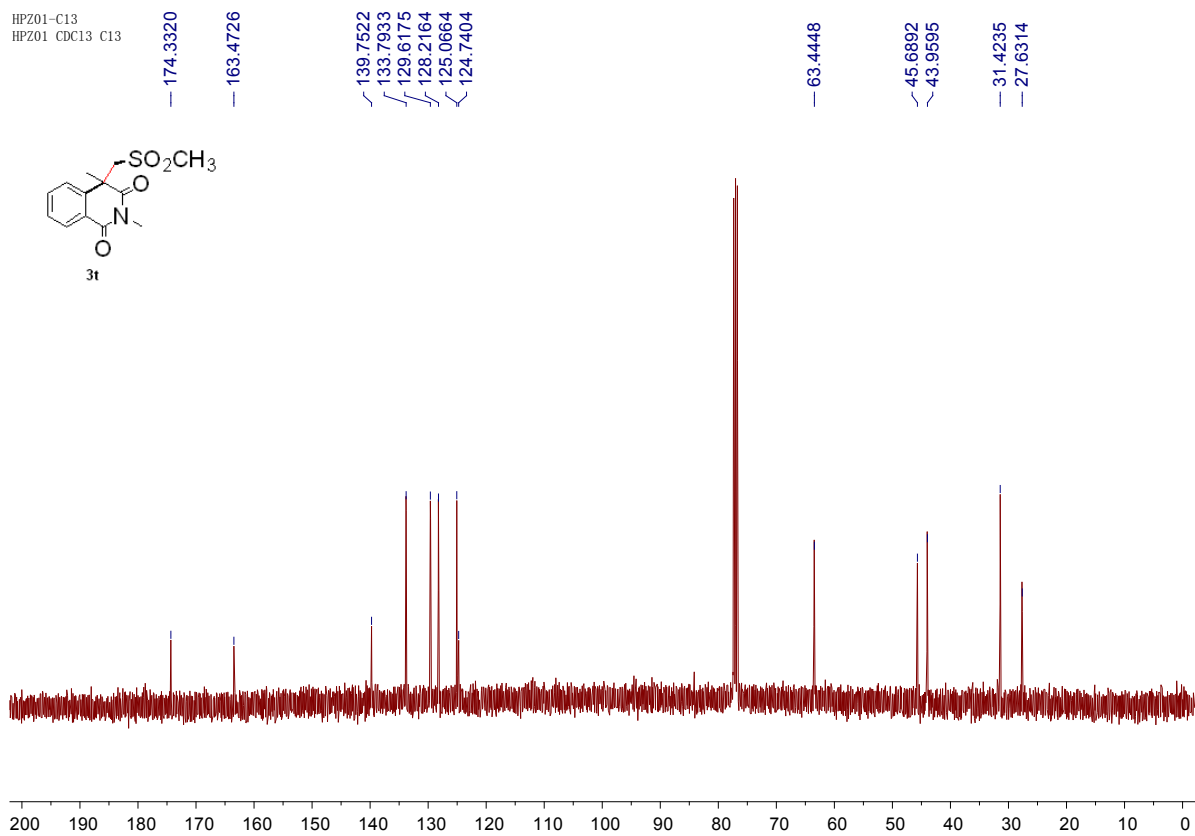

Supplement: c4ob01651c1.pdf [file c4ob01651c1.pdf]
